# Supplementary material
Source: publisher figshare collection journal article supplement (https://wiley.figshare.com/ndownloader/files/33579284)
Supplement: Supplementary file 1 [file 33579284]

## Sheet: Conc-response
Experiment	Chemical	Species	LC Summary	LCx (using corrected concentrations)	EC Summary	ECx (using corrected concentrations)
Single compound	IMI	HYA	Model fitted: Log-logistic (ED50 as parameter) (2 parms) Parameter estimates: Estimate Std. Error t-value p-value b:(Intercept) -1.89665 0.27001 -7.0245 2.148e-12 *** e:(Intercept) 363.24285 31.58520 11.5004 < 2.2e-16 *** --- Signif. codes: 0 ‘***’ 0.001 ‘**’ 0.01 ‘*’ 0.05 ‘.’ 0.1 ‘ ’ 1	Estimated effective doses Estimate Std. Error Lower Upper e:1:10 114.045 20.887 73.107 154.984 e:1:25 203.534 23.869 156.752 250.316 e:1:50 363.243 31.585 301.337 425.149 e:1:90 1156.956 219.441 726.859 1587.052	Model fitted: Log-logistic (ED50 as parameter) (2 parms) Parameter estimates: Estimate Std. Error t-value p-value b:(Intercept) -2.64953 0.39684 -6.6766 2.445e-11 *** e:(Intercept) 176.88250 14.04333 12.5955 < 2.2e-16 *** --- Signif. codes: 0 ‘***’ 0.001 ‘**’ 0.01 ‘*’ 0.05 ‘.’ 0.1 ‘ ’ 1	Estimated effective doses Estimate Std. Error Lower Upper e:1:10 77.184 13.143 51.425 102.944 e:1:25 116.844 13.722 89.949 143.739 e:1:50 176.882 14.043 149.358 204.407 e:1:90 405.359 48.757 309.797 500.921
Single compound	IMI	CD	Model fitted: Log-logistic (ED50 as parameter) (2 parms) Parameter estimates: Estimate Std. Error t-value p-value b:(Intercept) -1.12323 0.15151 -7.4135 1.23e-13 *** e:(Intercept) 11.82637 1.80910 6.5371 6.27e-11 *** --- Signif. codes: 0 ‘***’ 0.001 ‘**’ 0.01 ‘*’ 0.05 ‘.’ 0.1 ‘ ’ 1	Estimated effective doses Estimate Std. Error Lower Upper e:1:10 1.67225 0.50241 0.68755 2.65695 e:1:25 4.44709 0.88301 2.71643 6.17776 e:1:50 11.82637 1.80910 8.28059 15.37214 e:1:90 83.63758 25.88534 32.90325 134.37191	Model fitted: Log-logistic (ED50 as parameter) (2 parms) Parameter estimates: Estimate Std. Error t-value p-value b:(Intercept) -4.01503 0.74729 -5.3728 7.753e-08 *** e:(Intercept) 2.47354 0.18599 13.2996 < 2.2e-16 *** --- Signif. codes: 0 ‘***’ 0.001 ‘**’ 0.01 ‘*’ 0.05 ‘.’ 0.1 ‘ ’ 1	Estimated effective doses Estimate Std. Error Lower Upper e:1:10 1.43104 0.18489 1.06865 1.79343 e:1:25 1.88142 0.17427 1.53986 2.22299 e:1:50 2.47354 0.18599 2.10902 2.83807 e:1:90 4.27550 0.52994 3.23684 5.31416
Single compound	IMI	LV	Model fitted: Log-logistic (ED50 as parameter) (2 parms) Parameter estimates: Estimate Std. Error t-value p-value b:(Intercept) -35.0454 126.4569 -0.2771 0.7817 e:(Intercept) 45.3682 7.5368 6.0196 1.749e-09 *** --- Signif. codes: 0 ‘***’ 0.001 ‘**’ 0.01 ‘*’ 0.05 ‘.’ 0.1 ‘ ’ 1	Estimated effective doses Estimate Std. Error Lower Upper e:1:10 42.6111 16.7043 9.8713 75.3509 e:1:25 43.9680 12.2672 19.9248 68.0112 e:1:50 45.3682 7.5368 30.5964 60.1400 e:1:90 48.3037 3.0086 42.4069 54.2004	Model fitted: Log-logistic (ED50 as parameter) (2 parms) Parameter estimates: Estimate Std. Error t-value p-value b:(Intercept) -35.3127 158.7757 -0.2224 0.824 e:(Intercept) 32.3587 2.8751 11.2548 <2e-16 *** --- Signif. codes: 0 ‘***’ 0.001 ‘**’ 0.01 ‘*’ 0.05 ‘.’ 0.1 ‘ ’ 1	Estimated effective doses Estimate Std. Error Lower Upper e:1:10 30.4066 11.1928 8.4692 52.3440 e:1:25 31.3675 7.1618 17.3306 45.4043 e:1:50 32.3587 2.8751 26.7236 37.9938 e:1:90 34.4360 6.6086 21.4834 47.3887
Single compound	IMI	NEO	Model fitted: Log-logistic (ED50 as parameter) (2 parms) Parameter estimates: Estimate Std. Error t-value p-value b:(Intercept) -3.67991 0.74115 -4.9652 6.865e-07 *** e:(Intercept) 5.20866 0.50359 10.3431 < 2.2e-16 *** --- Signif. codes: 0 ‘***’ 0.001 ‘**’ 0.01 ‘*’ 0.05 ‘.’ 0.1 ‘ ’ 1	Estimated effective doses Estimate Std. Error Lower Upper e:1:10 2.86691 0.43702 2.01037 3.72345 e:1:25 3.86429 0.43508 3.01154 4.71704 e:1:50 5.20866 0.50359 4.22165 6.19567 e:1:90 9.46318 1.47762 6.56709 12.35926	Model fitted: Log-logistic (ED50 as parameter) (2 parms) Parameter estimates: Estimate Std. Error t-value p-value b:(Intercept) -4.54636 0.95057 -4.7828 1.729e-06 *** e:(Intercept) 3.10993 0.27807 11.1840 < 2.2e-16 *** --- Signif. codes: 0 ‘***’ 0.001 ‘**’ 0.01 ‘*’ 0.05 ‘.’ 0.1 ‘ ’ 1	Estimated effective doses Estimate Std. Error Lower Upper e:1:10 1.91805 0.25931 1.40981 2.42629 e:1:25 2.44234 0.25126 1.94988 2.93479 e:1:50 3.10993 0.27807 2.56493 3.65494 e:1:90 5.04246 0.67902 3.71160 6.37333
Single compound	TBZ	HYA	Model fitted: Log-logistic (ED50 as parameter) (2 parms) Parameter estimates: Estimate Std. Error t-value p-value b:(Intercept) -1.71975 0.21858 -7.8679 3.58e-15 *** e:(Intercept) 2367.27312 278.40192 8.5031 < 2.2e-16 *** --- Signif. codes: 0 ‘***’ 0.001 ‘**’ 0.01 ‘*’ 0.05 ‘.’ 0.1 ‘ ’ 1	Estimated effective doses Estimate Std. Error Lower Upper e:1:10 659.74 132.29 400.47 919.02 e:1:25 1249.72 178.61 899.65 1599.78 e:1:50 2367.27 278.40 1821.62 2912.93 e:1:90 8494.20 1703.00 5156.39 11832.02	Model fitted: Log-logistic (ED50 as parameter) (2 parms) Parameter estimates: Estimate Std. Error t-value p-value b:(Intercept) -2.61770 0.36766 -7.120 1.08e-12 *** e:(Intercept) 1596.11340 150.38327 10.614 < 2.2e-16 *** --- Signif. codes: 0 ‘***’ 0.001 ‘**’ 0.01 ‘*’ 0.05 ‘.’ 0.1 ‘ ’ 1	Estimated effective doses Estimate Std. Error Lower Upper e:1:10 689.49 104.71 484.27 894.71 e:1:25 1049.05 117.26 819.22 1278.88 e:1:50 1596.11 150.38 1301.37 1890.86 e:1:90 3694.87 554.10 2608.85 4780.88
Single compound	TBZ	CD	Model fitted: Log-logistic (ED50 as parameter) (2 parms) Parameter estimates: Estimate Std. Error t-value p-value b:(Intercept) -4.13362 0.71698 -5.7653 8.15e-09 *** e:(Intercept) 1898.96188 141.04519 13.4635 < 2.2e-16 *** --- Signif. codes: 0 ‘***’ 0.001 ‘**’ 0.01 ‘*’ 0.05 ‘.’ 0.1 ‘ ’ 1	Estimated effective doses Estimate Std. Error Lower Upper e:1:10 1116.01 134.43 852.54 1379.48 e:1:25 1455.77 129.29 1202.36 1709.17 e:1:50 1898.96 141.05 1622.52 2175.41 e:1:90 3231.21 375.78 2494.69 3967.73	Model fitted: Log-logistic (ED50 as parameter) (2 parms) Parameter estimates: Estimate Std. Error t-value p-value b:(Intercept) -22.207 102.343 -0.2170 0.8282 e:(Intercept) 1236.921 865.083 1.4298 0.1528	Estimated effective doses Estimate Std. Error Lower Upper e:1:10 1120.397 275.837 579.766 1661.027 e:1:25 1177.218 555.786 87.897 2266.538 e:1:50 1236.921 865.083 -458.611 2932.453 e:1:90 1365.564 1576.919 -1725.140 4456.268
Single compound	TBZ	LV	Binomial OR LL2: Model fitted: Log-logistic (ED50 as parameter) (2 parms) Parameter estimates: Estimate Std. Error t-value p-value b:(Intercept) -17.508 89.353 -0.1959 0.8447 e:(Intercept) 8816.519 1606.960 5.4865 4.101e-08 *** --- Signif. codes: 0 ‘***’ 0.001 ‘**’ 0.01 ‘*’ 0.05 ‘.’ 0.1 ‘ ’ 1	Binomial: LC50 = 11395 (8486 - 16972) LL2: 8816.52 (5666.94-11966.10)	Binomial	EC50 = 6001 (4243 - 8486)
Single compound	TBZ	NEO	Model fitted: Log-logistic (ED50 as parameter) (2 parms) Parameter estimates: Estimate Std. Error t-value p-value b:(Intercept) -1.19952 0.17252 -6.9528 3.581e-12 *** e:(Intercept) 1245.61597 222.12448 5.6077 2.050e-08 *** --- Signif. codes: 0 ‘***’ 0.001 ‘**’ 0.01 ‘*’ 0.05 ‘.’ 0.1 ‘ ’ 1	Estimated effective doses Estimate Std. Error Lower Upper e:1:10 199.462 59.100 83.629 315.295 e:1:25 498.451 102.689 297.184 699.718 e:1:50 1245.616 222.124 810.260 1680.972 e:1:90 7778.705 2633.618 2616.908 12940.502	Model fitted: Log-logistic (ED50 as parameter) (2 parms) Parameter estimates: Estimate Std. Error t-value p-value b:(Intercept) -1.26663 0.17882 -7.0832 1.409e-12 *** e:(Intercept) 1027.38290 175.35760 5.8588 4.663e-09 *** --- Signif. codes: 0 ‘***’ 0.001 ‘**’ 0.01 ‘*’ 0.05 ‘.’ 0.1 ‘ ’ 1	Estimated effective doses Estimate Std. Error Lower Upper e:1:10 181.286 51.613 80.126 282.446 e:1:25 431.567 86.422 262.182 600.951 e:1:50 1027.383 175.358 683.688 1371.077 e:1:90 5822.384 1814.902 2265.242 9379.527
IMI-TBZ mixture expt	IMI	CD	Model fitted: Log-logistic (ED50 as parameter) (2 parms) Parameter estimates: Estimate Std. Error t-value p-value b:(Intercept) -1.98612 0.33712 -5.8914 3.829e-09 *** e:(Intercept) 7.25992 0.97650 7.4346 1.048e-13 *** --- Signif. codes: 0 ‘***’ 0.001 ‘**’ 0.01 ‘*’ 0.05 ‘.’ 0.1 ‘ ’ 1	Estimated effective doses Estimate Std. Error Lower Upper e:1:10 2.40147 0.53926 1.34454 3.45841 e:1:25 4.17546 0.66602 2.87008 5.48085 e:1:50 7.25992 0.97650 5.34601 9.17383 e:1:90 21.94757 5.20676 11.74252 32.15263
IMI-TBZ mixture expt	IMI	LV	Binomial	LC50 = 43.5 (30.8 - 61.6)
IMI-TBZ mixture expt	IMI	HYA	Model fitted: Log-logistic (ED50 as parameter) (2 parms) Parameter estimates: Estimate Std. Error t-value p-value b:(Intercept) -2.10205 0.46214 -4.5486 5.402e-06 *** e:(Intercept) 595.46214 91.52789 6.5058 7.728e-11 *** --- Signif. codes: 0 ‘***’ 0.001 ‘**’ 0.01 ‘*’ 0.05 ‘.’ 0.1 ‘ ’ 1	Estimated effective doses Estimate Std. Error Lower Upper e:1:10 209.361 46.270 118.674 300.048 e:1:25 353.082 53.585 248.057 458.106 e:1:50 595.462 91.528 416.071 774.854 e:1:90 1693.606 546.250 622.977 2764.236
IMI-TBZ mixture expt	IMI	NEO	Model fitted: Log-logistic (ED50 as parameter) (2 parms) Parameter estimates: Estimate Std. Error t-value p-value b:(Intercept) -6.42986 1.60679 -4.0017 6.29e-05 *** e:(Intercept) 3.73997 0.29738 12.5763 < 2.2e-16 *** --- Signif. codes: 0 ‘***’ 0.001 ‘**’ 0.01 ‘*’ 0.05 ‘.’ 0.1 ‘ ’ 1	Estimated effective doses Estimate Std. Error Lower Upper e:1:10 2.65742 0.26951 2.12918 3.18565 e:1:25 3.15256 0.25380 2.65513 3.65000 e:1:50 3.73997 0.29738 3.15711 4.32283 e:1:90 5.26352 0.68514 3.92066 6.60637
IMI-TBZ mixture expt	TBZ	CD	Model fitted: Log-logistic (ED50 as parameter) (2 parms) Parameter estimates: Estimate Std. Error t-value p-value b:(Intercept) -17.763 103.158 -0.1722 0.8633 e:(Intercept) 2034.542 274.554 7.4103 1.259e-13 *** --- Signif. codes: 0 ‘***’ 0.001 ‘**’ 0.01 ‘*’ 0.05 ‘.’ 0.1 ‘ ’ 1	Estimated effective doses Estimate Std. Error Lower Upper e:1:10 1797.82 1054.29 -268.54 3864.19 e:1:25 1912.52 436.33 1057.33 2767.71 e:1:50 2034.54 274.55 1496.43 2572.66 e:1:90 2302.43 1959.84 -1538.79 6143.65
IMI-TBZ mixture expt	TBZ	LV	Model fitted: Log-logistic (ED50 as parameter) (2 parms) Parameter estimates: Estimate Std. Error t-value p-value b:(Intercept) -17.508 89.353 -0.1959 0.8447 e:(Intercept) 8816.519 1606.960 5.4865 4.101e-08 *** --- Signif. codes: 0 ‘***’ 0.001 ‘**’ 0.01 ‘*’ 0.05 ‘.’ 0.1 ‘ ’ 1	Estimated effective doses Estimate Std. Error Lower Upper e:1:10 7776.66 3585.02 750.14 14803.17 e:1:25 8280.28 1179.97 5967.59 10592.97 e:1:50 8816.52 1606.96 5666.94 11966.10 e:1:90 9995.43 8208.60 -6093.12 26083.98
IMI-TBZ mixture expt	TBZ	HYA	Model fitted: Log-logistic (ED50 as parameter) (2 parms) Parameter estimates: Estimate Std. Error t-value p-value b:(Intercept) -2.60484 0.60946 -4.2740 1.920e-05 *** e:(Intercept) 5666.35854 754.88226 7.5063 6.084e-14 *** --- Signif. codes: 0 ‘***’ 0.001 ‘**’ 0.01 ‘*’ 0.05 ‘.’ 0.1 ‘ ’ 1	Estimated effective doses Estimate Std. Error Lower Upper e:1:10 2437.64 478.70 1499.40 3375.88 e:1:25 3716.52 504.39 2727.93 4705.11 e:1:50 5666.36 754.88 4186.82 7145.90 e:1:90 13171.61 3603.17 6109.54 20233.69
IMI-TBZ mixture expt	TBZ	NEO	Model fitted: Log-logistic (ED50 as parameter) (2 parms) Parameter estimates: Estimate Std. Error t-value p-value b:(Intercept) -2.23961 0.38835 -5.7670 8.071e-09 *** e:(Intercept) 1012.70000 127.76706 7.9261 2.241e-15 *** --- Signif. codes: 0 ‘***’ 0.001 ‘**’ 0.01 ‘*’ 0.05 ‘.’ 0.1 ‘ ’ 1	Estimated effective doses Estimate Std. Error Lower Upper e:1:10 379.669 78.329 226.146 533.192 e:1:25 620.073 91.983 439.789 800.357 e:1:50 1012.700 127.767 762.281 1263.119 e:1:90 2701.201 586.557 1551.570 3850.832

## Sheet: IMI
Compound	Replicate	Species	Nominal concentration (ug/L)	Measured concentration (ug/L)	Concentration % difference	Corrected concentration (ug/L)	Total	Mortality 96h	Effected 96h	Survival 96 h	Vessel	Substrate	Temperature (C) +/- 1	pH Initial	Conductivity Initial	DO Initial	pH Final	Conductivity Final	DO Final
imidacloprid	1	Hyalella azteca	0			0	10	0	0	10	250 mL beaker	gauze	23	8.3	306	9	7.8	310	6.9
imidacloprid	1	Hyalella azteca	118			118	10	2	2	8	250 mL beaker	gauze	23	8.3	295	9.2	7.7	315	6.8
imidacloprid	1	Hyalella azteca	168			168	10	2	2	8	250 mL beaker	gauze	23	8.3	313	9.2	7.9	346	7.4
imidacloprid	1	Hyalella azteca	240	240	0	240	10	1	1	9	250 mL beaker	gauze	23	8.3	315	9.3	7.9	315	7.4
imidacloprid	1	Hyalella azteca	343			343	10	7	7	3	250 mL beaker	gauze	23	8.2	315	9.4	7.9	332	7.4
imidacloprid	1	Hyalella azteca	490			490	10	4	8	6	250 mL beaker	gauze	23	8.2	293	9.5	8	335	7.7
imidacloprid	1	Hyalella azteca	700			700	10	8	10	2	250 mL beaker	gauze	23	8.2	308	9.5	7.9	343	7.2
imidacloprid	1	Hyalella azteca	1000	1000	0	1000	10	9	10	1	250 mL beaker	gauze	23	8.2	306	9.9	7.7	347	7.4
imidacloprid	2	Hyalella azteca	0			0	10	0	0	10	250 mL beaker	gauze	23				7.9	338	7.8
imidacloprid	2	Hyalella azteca	118			118	10	1	4	9	250 mL beaker	gauze	23				7.9	345	7.1
imidacloprid	2	Hyalella azteca	168			168	10	2	10	8	250 mL beaker	gauze	23				8	332	7.5
imidacloprid	2	Hyalella azteca	240	240	0	240	10	2	10	8	250 mL beaker	gauze	23				7.9	330	7.5
imidacloprid	2	Hyalella azteca	343			343	10	5	10	5	250 mL beaker	gauze	23				7.8	317	7.2
imidacloprid	2	Hyalella azteca	490			490	10	3	10	7	250 mL beaker	gauze	23				7.9	357	7.4
imidacloprid	2	Hyalella azteca	700			700	10	7	10	3	250 mL beaker	gauze	23				7.9	342	7.4
imidacloprid	2	Hyalella azteca	1000	1000	0	1000	10	8	10	2	250 mL beaker	gauze	23				7.9	344	7.5
imidacloprid	3	Hyalella azteca	0			0	10	0	0	10	250 mL beaker	gauze	23				7.9	325	7.7
imidacloprid	3	Hyalella azteca	118			118	10	1	4	9	250 mL beaker	gauze	23				8	319	7.4
imidacloprid	3	Hyalella azteca	168			168	10	2	2	8	250 mL beaker	gauze	23				8	351	7.6
imidacloprid	3	Hyalella azteca	240	240	0	240	10	2	5	8	250 mL beaker	gauze	23				7.9	336	7.4
imidacloprid	3	Hyalella azteca	343			343	10	8	10	2	250 mL beaker	gauze	23				7.9	326	7.2
imidacloprid	3	Hyalella azteca	490			490	10	9	10	1	250 mL beaker	gauze	23				7.9	332	7.2
imidacloprid	3	Hyalella azteca	700			700	10	8	10	2	250 mL beaker	gauze	23				8	343	7.6
imidacloprid	3	Hyalella azteca	1000	1000	0	1000	10	10	10	0	250 mL beaker	gauze	23				7.9	338	7.5
imidacloprid	1	Chironomus dilutus	0			0	10	0	0	10	250 mL beaker	sand	23	8.3	310	8.6	8.1	330	7.3
imidacloprid	1	Chironomus dilutus	1.6			1.36	10	0	1	10	250 mL beaker	sand	23
imidacloprid	1	Chironomus dilutus	3.1			2.635	10	0	4	10	250 mL beaker	sand	23
imidacloprid	1	Chironomus dilutus	6.3			5.355	10	2	9	8	250 mL beaker	sand	23
imidacloprid	1	Chironomus dilutus	12.5			10.625	10	7	10	3	250 mL beaker	sand	23
imidacloprid	1	Chironomus dilutus	25			21.25	10	7	10	3	250 mL beaker	sand	23
imidacloprid	1	Chironomus dilutus	50	43	0.15	42.5	10	8	10	2	250 mL beaker	sand	23
imidacloprid	1	Chironomus dilutus	100			85	10	10	10	0	250 mL beaker	sand	23	8.3	310	8.6	8.1	330	7.3
imidacloprid	2	Chironomus dilutus	0			0	10	0	0	10	250 mL beaker	sand	23
imidacloprid	2	Chironomus dilutus	1.6			1.36	10	0	0	10	250 mL beaker	sand	23
imidacloprid	2	Chironomus dilutus	3.1			2.635	10	0	5	10	250 mL beaker	sand	23
imidacloprid	2	Chironomus dilutus	6.3			5.355	10	4	10	6	250 mL beaker	sand	23
imidacloprid	2	Chironomus dilutus	12.5			10.625	10	6	10	4	250 mL beaker	sand	23
imidacloprid	2	Chironomus dilutus	25			21.25	10	7	10	3	250 mL beaker	sand	23
imidacloprid	2	Chironomus dilutus	50			42.5	10	8	10	2	250 mL beaker	sand	23
imidacloprid	2	Chironomus dilutus	100			85	10	9	10	1	250 mL beaker	sand	23
imidacloprid	3	Chironomus dilutus	0			0	10	0	0	10	250 mL beaker	sand	23
imidacloprid	3	Chironomus dilutus	1.6			1.36	10	1	2	9	250 mL beaker	sand	23
imidacloprid	3	Chironomus dilutus	3.1			2.635	10	3	7	7	250 mL beaker	sand	23
imidacloprid	3	Chironomus dilutus	6.3			5.355	10	5	10	5	250 mL beaker	sand	23
imidacloprid	3	Chironomus dilutus	12.5			10.625	10	4	10	6	250 mL beaker	sand	23
imidacloprid	3	Chironomus dilutus	25			21.25	10	6	10	4	250 mL beaker	sand	23
imidacloprid	3	Chironomus dilutus	50			42.5	10	7	10	3	250 mL beaker	sand	23
imidacloprid	3	Chironomus dilutus	100			85	10	7	10	3	250 mL beaker	sand	23
imidacloprid	1	Lumbriculus variegatus	0			0	10	0	0	10	250 mL beaker	none	23	8.3	304	9.2	8.3	327	8.3
imidacloprid	1	Lumbriculus variegatus	8			7.8	10	0	0	10	250 mL beaker	none	23	8.3	307	9.1	8.3	323	8.3
imidacloprid	1	Lumbriculus variegatus	12			11.6	10	0	0	10	250 mL beaker	none	23	8.3	305	9.2	8.3	307	8.3
imidacloprid	1	Lumbriculus variegatus	17			16.5	10	0	0	10	250 mL beaker	none	23	8.3	307	9.2	8.3	335	8.2
imidacloprid	1	Lumbriculus variegatus	24			23.3	10	0	0	10	250 mL beaker	none	23	8.3	302	9.2	8.2	328	8.2
imidacloprid	1	Lumbriculus variegatus	34	34	0	33	10	0	10	10	250 mL beaker	none	23	8.3	302	9.2	8.2	321	8.2
imidacloprid	1	Lumbriculus variegatus	49			47.5	10	8	10	2	250 mL beaker	none	23	8.3	300	9.2	8.2	327	8.2
imidacloprid	1	Lumbriculus variegatus	70	66	0.06	67.9	10	10	10	0	250 mL beaker	none	23	8.3	302	9.3	8.2	340	7.8
imidacloprid	2	Lumbriculus variegatus	0			0	10	0	0	10	250 mL beaker	none	23				8.3	355	8.2
imidacloprid	2	Lumbriculus variegatus	8			7.8	10	0	0	10	250 mL beaker	none	23				8.3	332	8.3
imidacloprid	2	Lumbriculus variegatus	12			11.6	10	0	0	10	250 mL beaker	none	23				8.3	340	8.3
imidacloprid	2	Lumbriculus variegatus	17			16.5	10	0	0	10	250 mL beaker	none	23				8.3	337	8.3
imidacloprid	2	Lumbriculus variegatus	24			23.3	10	0	0	10	250 mL beaker	none	23				8.3	336	8.2
imidacloprid	2	Lumbriculus variegatus	34	34	0	33	10	0	0	10	250 mL beaker	none	23				8.3	330	8.2
imidacloprid	2	Lumbriculus variegatus	49			47.5	10	7	10	3	250 mL beaker	none	23				8.2	335	8.2
imidacloprid	2	Lumbriculus variegatus	70	66	0.06	67.9	10	10	10	0	250 mL beaker	none	23				8.2	341	7.8
imidacloprid	3	Lumbriculus variegatus	0			0	10	0	0	10	250 mL beaker	none	23				8.2	336	8.2
imidacloprid	3	Lumbriculus variegatus	8			7.8	10	0	0	10	250 mL beaker	none	23				8.3	331	8.3
imidacloprid	3	Lumbriculus variegatus	12			11.6	10	0	0	10	250 mL beaker	none	23				8.3	328	8.2
imidacloprid	3	Lumbriculus variegatus	17			16.5	10	0	0	10	250 mL beaker	none	23				8.3	334	8.3
imidacloprid	3	Lumbriculus variegatus	24			23.3	10	0	0	10	250 mL beaker	none	23				8.3	348	8.3
imidacloprid	3	Lumbriculus variegatus	34	34	0	33	10	0	10	10	250 mL beaker	none	23				8.3	335	8.3
imidacloprid	3	Lumbriculus variegatus	49			47.5	10	10	10	0	250 mL beaker	none	23				8.2	330	7.9
imidacloprid	3	Lumbriculus variegatus	70	66	0.06	67.9	10	10	10	0	250 mL beaker	none	23				8.1	352	7.7
imidacloprid	1	Neocloeon triangulifer	0			0	5	0	0	5	30 mL medicine cups	none	25	8.3	340	8.5	8.6	385	8.4
imidacloprid	1	Neocloeon triangulifer	0.3			0.3	5	0	0	5	30 mL medicine cups	none	25
imidacloprid	1	Neocloeon triangulifer	0.6			0.5	5	0	0	5	30 mL medicine cups	none	25
imidacloprid	1	Neocloeon triangulifer	1.3			1.1	5	1	1	4	30 mL medicine cups	none	25
imidacloprid	1	Neocloeon triangulifer	2.5			2.2	5	0	0	5	30 mL medicine cups	none	25
imidacloprid	1	Neocloeon triangulifer	5	4.4	0.13	4.4	5	0	4	5	30 mL medicine cups	none	25
imidacloprid	1	Neocloeon triangulifer	10			8.7	5	5	5	0	30 mL medicine cups	none	25
imidacloprid	1	Neocloeon triangulifer	20			17.4	5	5	5	0	30 mL medicine cups	none	25	8.3	338	8.5	8.6	374	8.4
imidacloprid	2	Neocloeon triangulifer	0			0	5	1	1	4	30 mL medicine cups	none	25
imidacloprid	2	Neocloeon triangulifer	0.3			0.3	5	0	0	5	30 mL medicine cups	none	25
imidacloprid	2	Neocloeon triangulifer	0.6			0.5	5	0	0	5	30 mL medicine cups	none	25
imidacloprid	2	Neocloeon triangulifer	1.3			1.1	5	0	0	5	30 mL medicine cups	none	25
imidacloprid	2	Neocloeon triangulifer	2.5			2.2	5	0	0	5	30 mL medicine cups	none	25
imidacloprid	2	Neocloeon triangulifer	5			4.4	5	1	5	4	30 mL medicine cups	none	25
imidacloprid	2	Neocloeon triangulifer	10			8.7	5	5	5	0	30 mL medicine cups	none	25
imidacloprid	2	Neocloeon triangulifer	20			17.4	5	5	5	0	30 mL medicine cups	none	25
imidacloprid	3	Neocloeon triangulifer	0			0	5	0	0	5	30 mL medicine cups	none	25
imidacloprid	3	Neocloeon triangulifer	0.3			0.3	5	0	0	5	30 mL medicine cups	none	25
imidacloprid	3	Neocloeon triangulifer	0.6			0.5	5	0	0	5	30 mL medicine cups	none	25
imidacloprid	3	Neocloeon triangulifer	1.3			1.1	5	0	0	5	30 mL medicine cups	none	25
imidacloprid	3	Neocloeon triangulifer	2.5			2.2	5	0	0	5	30 mL medicine cups	none	25
imidacloprid	3	Neocloeon triangulifer	5			4.4	5	1	4	4	30 mL medicine cups	none	25
imidacloprid	3	Neocloeon triangulifer	10			8.7	5	5	5	0	30 mL medicine cups	none	25
imidacloprid	3	Neocloeon triangulifer	20			17.4	5	5	5	0	30 mL medicine cups	none	25
imidacloprid	4	Neocloeon triangulifer	0			0	5	0	0	5	30 mL medicine cups	none	25
imidacloprid	4	Neocloeon triangulifer	0.3			0.3	5	0	0	5	30 mL medicine cups	none	25
imidacloprid	4	Neocloeon triangulifer	0.6			0.5	5	0	0	5	30 mL medicine cups	none	25
imidacloprid	4	Neocloeon triangulifer	1.3			1.1	5	1	1	4	30 mL medicine cups	none	25
imidacloprid	4	Neocloeon triangulifer	2.5			2.2	5	0	0	5	30 mL medicine cups	none	25
imidacloprid	4	Neocloeon triangulifer	5			4.4	5	1	5	4	30 mL medicine cups	none	25
imidacloprid	4	Neocloeon triangulifer	10			8.7	5	5	5	0	30 mL medicine cups	none	25
imidacloprid	4	Neocloeon triangulifer	20			17.4	5	5	5	0	30 mL medicine cups	none	25

## Sheet: TBZ
Compound	Replicate	Species	Nominal concentration (ug/L)	Measured concentration (ug/L)	Concentration % difference	Corrected concentration (ug/L)	Total	Mortality 96h	Effected 96h	Survival 96 h	Vessel	Substrate	Temperature (C) +/- 1	pH Initial	Conductivity Initial	DO Initial	pH Final	Conductivity Final	DO Final
tebuconazole	1	Chironomus dilutus	0		0	10	0	0	10	10	250 mL beaker	sand	23	8.2	329	8.8	7.9	356	7.1
tebuconazole	1	Chironomus dilutus	338		265.533	10	1	0	9	10	250 mL beaker	sand	23	8.2	324	8.6	7.9	359	7.1
tebuconazole	1	Chironomus dilutus	677		531.851	10	0	0	10	10	250 mL beaker	sand	23	8.3	323	8.6	7.9	354	7.1
tebuconazole	1	Chironomus dilutus	1353		1062.92	10	0	0	10	10	250 mL beaker	sand	23	8.3	324	8.6	7.9	363	7.1
tebuconazole	1	Chironomus dilutus	2706		2125.83	10	7	10	3	0	250 mL beaker	sand	23	8.3	324	8.5	7.9	349	7
tebuconazole	1	Chironomus dilutus	5413		4252.45	10	10	10	0	0	250 mL beaker	sand	23	8.3	323	8.5	7.9	346	6.8
tebuconazole	1	Chironomus dilutus	10825		8504.12	10	10	10	0	0	250 mL beaker	sand	23	8.3	323	8.3	7.9	344	6.8
tebuconazole	1	Chironomus dilutus	21650		17008.2	10	10	10	0	0	250 mL beaker	sand	23	8.3	322	8	7.9	353	6.8
tebuconazole	2	Chironomus dilutus	0		0	10	0	0	10	10	250 mL beaker	sand	23				7.9	355	7.1
tebuconazole	2	Chironomus dilutus	338		265.533	10	0	0	10	10	250 mL beaker	sand	23				7.9	357	7
tebuconazole	2	Chironomus dilutus	677		531.851	10	0	0	10	10	250 mL beaker	sand	23				7.9	348	7
tebuconazole	2	Chironomus dilutus	1353		1062.92	10	1	1	9	9	250 mL beaker	sand	23				7.9	352	7
tebuconazole	2	Chironomus dilutus	2706		2125.83	10	5	10	5	0	250 mL beaker	sand	23				7.9	352	7
tebuconazole	2	Chironomus dilutus	5413		4252.45	10	10	10	0	0	250 mL beaker	sand	23				7.9	353	7
tebuconazole	2	Chironomus dilutus	10825		8504.12	10	10	10	0	0	250 mL beaker	sand	23				7.9	356	7
tebuconazole	2	Chironomus dilutus	21650		17008.2	10	10	10	0	0	250 mL beaker	sand	23				7.9	349	6.9
tebuconazole	3	Chironomus dilutus	0		0	10	0	0	10	10	250 mL beaker	sand	23				7.9	348	7
tebuconazole	3	Chironomus dilutus	338		265.533	10	0	0	10	10	250 mL beaker	sand	23				7.9	349	7
tebuconazole	3	Chironomus dilutus	677		531.851	10	0	0	10	10	250 mL beaker	sand	23				7.9	348	7
tebuconazole	3	Chironomus dilutus	1353		1062.92	10	0	0	10	10	250 mL beaker	sand	23				7.9	354	7
tebuconazole	3	Chironomus dilutus	2706		2125.83	10	6	10	4	0	250 mL beaker	sand	23				7.9	351	7
tebuconazole	3	Chironomus dilutus	5413		4252.45	10	10	10	0	0	250 mL beaker	sand	23				7.9	353	6.8
tebuconazole	3	Chironomus dilutus	10825		8504.12	10	10	10	0	0	250 mL beaker	sand	23				7.9	359	6.9
tebuconazole	3	Chironomus dilutus	21650		17008.2	10	10	10	0	0	250 mL beaker	sand	23				7.9	352	6.8
tebuconazole	1	Hyalella azteca	0		0	10	0	0	10	10	250 mL beaker	gauze	23	8.2	334	8.6	8	315	7.3
tebuconazole	1	Hyalella azteca	312.5		295.938	10	1	1	9	9	250 mL beaker	gauze	23	8.2	327	8.6	7.9	327	7.2
tebuconazole	1	Hyalella azteca	625		591.875	10	1	1	9	9	250 mL beaker	gauze	23	8.2	326	8.7	7.9	325	7.3
tebuconazole	1	Hyalella azteca	1250		1183.75	10	2	2	8	8	250 mL beaker	gauze	23	8.2	326	8.7	7.9	340	7.1
tebuconazole	1	Hyalella azteca	2500		2367.5	10	10	10	0	0	250 mL beaker	gauze	23	8.2	326	8.7	7.9	337	6.9
tebuconazole	1	Hyalella azteca	5000		4735	10	7	10	3	0	250 mL beaker	gauze	23	8.3	325	8.7	7.8	327	7.1
tebuconazole	1	Hyalella azteca	10000		9470	10	10	10	0	0	250 mL beaker	gauze	23	8.3	326	8.6	7.9	323	7.3
tebuconazole	1	Hyalella azteca	20000		18940	10	10	10	0	0	250 mL beaker	gauze	23	8.3	325	8.5	7.9	331	6.9
tebuconazole	2	Hyalella azteca	0		0	10	1	1	9	9	250 mL beaker	gauze	23				8	332	7.3
tebuconazole	2	Hyalella azteca	312.5		295.938	10	0	0	10	10	250 mL beaker	gauze	23				7.9	330	7.2
tebuconazole	2	Hyalella azteca	625		591.875	10	2	2	8	8	250 mL beaker	gauze	23				7.9	345	7.3
tebuconazole	2	Hyalella azteca	1250		1183.75	10	1	1	9	9	250 mL beaker	gauze	23				7.9	327	6.8
tebuconazole	2	Hyalella azteca	2500		2367.5	10	5	10	5	0	250 mL beaker	gauze	23				7.9	331	6.9
tebuconazole	2	Hyalella azteca	5000		4735	10	6	10	4	0	250 mL beaker	gauze	23				7.9	359	7.2
tebuconazole	2	Hyalella azteca	10000		9470	10	10	10	0	0	250 mL beaker	gauze	23				7.8	320	7.2
tebuconazole	2	Hyalella azteca	20000		18940	10	10	10	0	0	250 mL beaker	gauze	23				7.9	331	7.2
tebuconazole	3	Hyalella azteca	0		0	10	0	0	10	10	250 mL beaker	gauze	23				8	332	7
tebuconazole	3	Hyalella azteca	312.5		295.938	10	1	1	9	9	250 mL beaker	gauze	23				8	327	6.9
tebuconazole	3	Hyalella azteca	625		591.875	10	0	0	10	10	250 mL beaker	gauze	23				7.9	344	6.8
tebuconazole	3	Hyalella azteca	1250		1183.75	10	2	2	8	8	250 mL beaker	gauze	23				7.8	340	6.9
tebuconazole	3	Hyalella azteca	2500		2367.5	10	2	2	8	8	250 mL beaker	gauze	23				7.8	330	7.3
tebuconazole	3	Hyalella azteca	5000		4735	10	5	10	5	0	250 mL beaker	gauze	23				7.8	327	7.4
tebuconazole	3	Hyalella azteca	10000		9470	10	10	10	0	0	250 mL beaker	gauze	23				7.9	325	7.3
tebuconazole	3	Hyalella azteca	20000		18940	10	10	10	0	0	250 mL beaker	gauze	23				7.9	332	7.2
tebuconazole	1	Lumbriculus variegatus	0		0	10	0	0	10	10	30 mL cup	none	25	8.2	323	8.7	8.3	383	8.1
tebuconazole	1	Lumbriculus variegatus	312.5		265.188	10	0	0	10	10	30 mL cup	none	25	8.2	322	8.7	8.3	372	8.1
tebuconazole	1	Lumbriculus variegatus	625		530.375	10	0	0	10	10	30 mL cup	none	25	8.2	323	8.7	8.3	368	8.1
tebuconazole	1	Lumbriculus variegatus	1250		1060.75	10	0	0	10	10	30 mL cup	none	25	8.2	323	8.6	8.3	365	8.1
tebuconazole	1	Lumbriculus variegatus	2500		2121.5	10	0	0	10	10	30 mL cup	none	25	8.2	322	8.6	8.3	377	8.1
tebuconazole	1	Lumbriculus variegatus	5000		4243	10	0	0	10	10	30 mL cup	none	25	8.2	322	8.6	8.3	370	8.1
tebuconazole	1	Lumbriculus variegatus	10000		8486	10	1	10	9	0	30 mL cup	none	25	8.3	323	8.3	8.3	401	8
tebuconazole	1	Lumbriculus variegatus	20000		16972	10	10	10	0	0	30 mL cup	none	25	8.3	321	8.1	8.3	374	7.9
tebuconazole	2	Lumbriculus variegatus	0		0	10	0	0	10	10	30 mL cup	none	25				8.3	376	8.2
tebuconazole	2	Lumbriculus variegatus	312.5		265.188	10	0	0	10	10	30 mL cup	none	25				8.3	375	8.2
tebuconazole	2	Lumbriculus variegatus	625		530.375	10	0	0	10	10	30 mL cup	none	25				8.3	371	8.1
tebuconazole	2	Lumbriculus variegatus	1250		1060.75	10	0	0	10	10	30 mL cup	none	25				8.3	373	8.1
tebuconazole	2	Lumbriculus variegatus	2500		2121.5	10	0	0	10	10	30 mL cup	none	25				8.3	375	8.1
tebuconazole	2	Lumbriculus variegatus	5000		4243	10	0	0	10	10	30 mL cup	none	25				8.3	370	8.2
tebuconazole	2	Lumbriculus variegatus	10000		8486	10	0	10	10	0	30 mL cup	none	25				8.3	367	8
tebuconazole	2	Lumbriculus variegatus	20000		16972	10	10	10	0	0	30 mL cup	none	25				8.3	380	7.9
tebuconazole	3	Lumbriculus variegatus	0		0	10	0	0	10	10	30 mL cup	none	25				8.3	378	8.1
tebuconazole	3	Lumbriculus variegatus	312.5		265.188	10	0	0	10	10	30 mL cup	none	25				8.3	377	8.1
tebuconazole	3	Lumbriculus variegatus	625		530.375	10	0	0	10	10	30 mL cup	none	25				8.3	379	8.2
tebuconazole	3	Lumbriculus variegatus	1250		1060.75	10	0	0	10	10	30 mL cup	none	25				8.3	376	8.1
tebuconazole	3	Lumbriculus variegatus	2500		2121.5	10	0	0	10	10	30 mL cup	none	25				8.3	371	8.1
tebuconazole	3	Lumbriculus variegatus	5000		4243	10	0	0	10	10	30 mL cup	none	25				8.3	370	8.2
tebuconazole	3	Lumbriculus variegatus	10000		8486	10	3	10	7	0	30 mL cup	none	25				8.3	368	7.9
tebuconazole	3	Lumbriculus variegatus	20000		16972	10	10	10	0	0	30 mL cup	none	25				8.3	401	7.9
tebuconazole	1	Neocloeon triangulifer	0		0	5	1	1	4	4	30 mL cup	none	25	8.3	314	8.5	8.6	375	8.3
tebuconazole	1	Neocloeon triangulifer	39.1		31.1822	5	1	1	4	4	30 mL cup	none	25	8.3	313	8.5	8.6	391	8.2
tebuconazole	1	Neocloeon triangulifer	78.1		62.2847	5	1	1	4	4	30 mL cup	none	25	8.3	317	8.5	8.6	371	8.2
tebuconazole	1	Neocloeon triangulifer	156.3		124.649	5	0	0	5	5	30 mL cup	none	25	8.3	316	8.5	8.6	373	8.2
tebuconazole	1	Neocloeon triangulifer	312.5		249.219	5	0	0	5	5	30 mL cup	none	25	8.3	315	8.5	8.6	390	8.2
tebuconazole	1	Neocloeon triangulifer	625		498.438	5	0	0	5	5	30 mL cup	none	25	8.3	315	8.5	8.6	376	8.2
tebuconazole	1	Neocloeon triangulifer	1250		996.875	5	0	0	5	5	30 mL cup	none	25	8.3	316	8.4	8.6	391	8.1
tebuconazole	1	Neocloeon triangulifer	2500		1993.75	5	5	5	0	0	30 mL cup	none	25	8.3	316	8.4	8.6	378	8.1
tebuconazole	1	Neocloeon triangulifer	5000		3987.5	5	5	5	0	0	30 mL cup	none	25	8.3	317	8.4	8.6	391	8.1
tebuconazole	1	Neocloeon triangulifer	10000		7975	5	5	5	0	0	30 mL cup	none	25	8.3	317	8.3	8.5	378	8.1
tebuconazole	2	Neocloeon triangulifer	0		0	5	0	0	5	5	30 mL cup	none	25
tebuconazole	2	Neocloeon triangulifer	39.1		31.1822	5	0	0	5	5	30 mL cup	none	25
tebuconazole	2	Neocloeon triangulifer	78.1		62.2847	5	0	0	5	5	30 mL cup	none	25
tebuconazole	2	Neocloeon triangulifer	156.3		124.649	5	1	1	4	4	30 mL cup	none	25
tebuconazole	2	Neocloeon triangulifer	312.5		249.219	5	0	0	5	5	30 mL cup	none	25
tebuconazole	2	Neocloeon triangulifer	625		498.438	5	0	0	5	5	30 mL cup	none	25
tebuconazole	2	Neocloeon triangulifer	1250		996.875	5	0	0	5	5	30 mL cup	none	25
tebuconazole	2	Neocloeon triangulifer	2500		1993.75	5	5	5	0	0	30 mL cup	none	25
tebuconazole	2	Neocloeon triangulifer	5000		3987.5	5	3	5	2	0	30 mL cup	none	25
tebuconazole	2	Neocloeon triangulifer	10000		7975	5	5	5	0	0	30 mL cup	none	25
tebuconazole	3	Neocloeon triangulifer	0		0	5	1	1	4	4	30 mL cup	none	25
tebuconazole	3	Neocloeon triangulifer	39.1		31.1822	5	1	1	4	4	30 mL cup	none	25
tebuconazole	3	Neocloeon triangulifer	78.1		62.2847	5	0	0	5	5	30 mL cup	none	25
tebuconazole	3	Neocloeon triangulifer	156.3		124.649	5	0	0	5	5	30 mL cup	none	25
tebuconazole	3	Neocloeon triangulifer	312.5		249.219	5	1	1	4	4	30 mL cup	none	25
tebuconazole	3	Neocloeon triangulifer	625		498.438	5	0	0	5	5	30 mL cup	none	25
tebuconazole	3	Neocloeon triangulifer	1250		996.875	5	1	1	4	4	30 mL cup	none	25
tebuconazole	3	Neocloeon triangulifer	2500		1993.75	5	3	3	2	2	30 mL cup	none	25
tebuconazole	3	Neocloeon triangulifer	5000		3987.5	5	3	5	2	0	30 mL cup	none	25
tebuconazole	3	Neocloeon triangulifer	10000		7975	5	5	5	0	0	30 mL cup	none	25
tebuconazole	4	Neocloeon triangulifer	0		0	5	0	0	5	5	30 mL cup	none	25
tebuconazole	4	Neocloeon triangulifer	39.1		31.1822	5	1	2	4	3	30 mL cup	none	25
tebuconazole	4	Neocloeon triangulifer	78.1		62.2847	5	0	0	5	5	30 mL cup	none	25
tebuconazole	4	Neocloeon triangulifer	156.3		124.649	5	1	1	4	4	30 mL cup	none	25
tebuconazole	4	Neocloeon triangulifer	312.5		249.219	5	0	0	5	5	30 mL cup	none	25
tebuconazole	4	Neocloeon triangulifer	625		498.438	5	1	1	4	4	30 mL cup	none	25
tebuconazole	4	Neocloeon triangulifer	1250		996.875	5	2	2	3	3	30 mL cup	none	25
tebuconazole	4	Neocloeon triangulifer	2500		1993.75	5	5	5	0	0	30 mL cup	none	25
tebuconazole	4	Neocloeon triangulifer	5000		3987.5	5	5	5	0	0	30 mL cup	none	25
tebuconazole	4	Neocloeon triangulifer	10000		7975	5	5	5	0	0	30 mL cup	none	25

## Sheet: IMI-TBZ
Species	Solution Number	Replicate Number	IMI Nominal (ug/L)	TBZ Nominal (ug/L)	IMI Corrected (ug/L)	TBZ Corrected (ug/L)	IMI TU	TBZ TU	TU Sum	Total	Mortality 96h	Effected 96h	Survival 96 h	Percent survival 96 h	Vessel	Substrate	Temperature (C) +/- 1	pH Initial	Conductivity Initial	DO Initial	pH Final	Conductivity Final	DO Final
Chironomus dilutus	0	1	0	0	0	0	0	0	0	10	0	0	10	100	250 mL beaker	sand	23	8.2	333	8.6	7.9	378	6.9
Chironomus dilutus	0	2	0	0	0	0	0	0	0	10	0	0	10	100	250 mL beaker	sand	23				7.9	371	7
Chironomus dilutus	1	1	1.5	0	0.9441	0	0.130041	0	0.130041	10	0	0	10	100	250 mL beaker	sand	23	8.2	332	8.7	8	368	7.1
Chironomus dilutus	1	2	1.5	0	0.9441	0	0.130041	0	0.130041	10	0	0	10	100	250 mL beaker	sand	23				8	364	7
Chironomus dilutus	2	1	3	0	1.8882	0	0.260083	0	0.260083	10	2	2	8	80	250 mL beaker	sand	23				8	368	7
Chironomus dilutus	2	2	3	0	1.8882	0	0.260083	0	0.260083	10	1	1	9	90	250 mL beaker	sand	23				8	370	6.9
Chironomus dilutus	3	1	5.9	0	3.71346	0	0.511496	0	0.511496	10	0	0	10	100	250 mL beaker	sand	23				7.9	369	6.8
Chironomus dilutus	3	2	5.9	0	3.71346	0	0.511496	0	0.511496	10	2	2	8	80	250 mL beaker	sand	23				7.9	366	6.9
Chironomus dilutus	4	1	11.8	0	7.42692	0	1.02299	0	1.02299	10	8	9	2	20	250 mL beaker	sand	23				8	377	6.9
Chironomus dilutus	4	2	11.8	0	7.42692	0	1.02299	0	1.02299	10	4	9	6	60	250 mL beaker	sand	23				7.9	372	7
Chironomus dilutus	5	1	23.6	0	14.8538	0	2.04598	0	2.04598	10	8	9	2	20	250 mL beaker	sand	23				7.9	362	6.9
Chironomus dilutus	5	2	23.6	0	14.8538	0	2.04598	0	2.04598	10	6	10	4	40	250 mL beaker	sand	23				7.9	363	6.8
Chironomus dilutus	6	1	47.2	0	29.7077	0	4.09197	0	4.09197	10	10	10	0	0	250 mL beaker	sand	23				7.9	362	6.7
Chironomus dilutus	6	2	47.2	0	29.7077	0	4.09197	0	4.09197	10	10	10	0	0	250 mL beaker	sand	23				7.9	364	6.7
Chironomus dilutus	7	1	1	99.7	0.6294	82.0232	0.0866942	0.0403261	0.12702	10	0	0	10	100	250 mL beaker	sand	23	8.2	330	8.7	7.9	366	7.1
Chironomus dilutus	7	2	1	99.7	0.6294	82.0232	0.0866942	0.0403261	0.12702	10	0	0	10	100	250 mL beaker	sand	23				8	363	7.1
Chironomus dilutus	8	1	2	199.4	1.2588	164.046	0.173388	0.0806521	0.254041	10	0	0	10	100	250 mL beaker	sand	23				7.9	380	7
Chironomus dilutus	8	2	2	199.4	1.2588	164.046	0.173388	0.0806521	0.254041	10	0	1	10	100	250 mL beaker	sand	23				7.9	371	7
Chironomus dilutus	9	1	4	398.8	2.5176	328.093	0.346777	0.161304	0.508081	10	0	0	10	100	250 mL beaker	sand	23				7.9	361	6.9
Chironomus dilutus	9	2	4	398.8	2.5176	328.093	0.346777	0.161304	0.508081	10	0	0	10	100	250 mL beaker	sand	23				7.9	362	6.9
Chironomus dilutus	10	1	7.9	797.7	4.97226	656.268	0.684884	0.322649	1.00753	10	4	4	6	60	250 mL beaker	sand	23				7.9	365	6.9
Chironomus dilutus	10	2	7.9	797.7	4.97226	656.268	0.684884	0.322649	1.00753	10	2	2	8	80	250 mL beaker	sand	23				7.9	362	6.9
Chironomus dilutus	11	1	15.8	1595.4	9.94452	1312.54	1.36977	0.645298	2.01507	10	10	10	0	0	250 mL beaker	sand	23				7.9	370	6.9
Chironomus dilutus	11	2	15.8	1595.4	9.94452	1312.54	1.36977	0.645298	2.01507	10	8	10	2	20	250 mL beaker	sand	23				7.9	369	7
Chironomus dilutus	12	1	31.6	3190.7	19.889	2624.99	2.73954	1.29056	4.03009	10	10	10	0	0	250 mL beaker	sand	23				7.9	361	6.7
Chironomus dilutus	12	2	31.6	3190.7	19.889	2624.99	2.73954	1.29056	4.03009	10	10	10	0	0	250 mL beaker	sand	23				7.9	363	6.7
Chironomus dilutus	13	1	0.74	151.1	0.465756	124.31	0.0641537	0.061116	0.12527	10	0	0	10	100	250 mL beaker	sand	23	8.2	331	8.7	7.9	362	7.1
Chironomus dilutus	13	2	0.74	151.1	0.465756	124.31	0.0641537	0.061116	0.12527	10	0	0	10	100	250 mL beaker	sand	23				8	356	7.3
Chironomus dilutus	14	1	1.5	302.2	0.9441	248.62	0.130041	0.122232	0.252273	10	0	0	10	100	250 mL beaker	sand	23				7.9	366	7
Chironomus dilutus	14	2	1.5	302.2	0.9441	248.62	0.130041	0.122232	0.252273	10	0	0	10	100	250 mL beaker	sand	23				7.9	371	7
Chironomus dilutus	15	1	3	604.3	1.8882	497.158	0.260083	0.244424	0.504506	10	0	0	10	100	250 mL beaker	sand	23				8	370	7
Chironomus dilutus	15	2	3	604.3	1.8882	497.158	0.260083	0.244424	0.504506	10	0	0	10	100	250 mL beaker	sand	23				7.9	367	7
Chironomus dilutus	16	1	5.9	1208.6	3.71346	994.315	0.511496	0.488847	1.00034	10	3	3	7	70	250 mL beaker	sand	23				8	375	7.4
Chironomus dilutus	16	2	5.9	1208.6	3.71346	994.315	0.511496	0.488847	1.00034	10	7	8	3	30	250 mL beaker	sand	23				8	371	7.2
Chironomus dilutus	17	1	11.8	2417.2	7.42692	1988.63	1.02299	0.977694	2.00069	10	5	10	5	50	250 mL beaker	sand	23				8	360	7
Chironomus dilutus	17	2	11.8	2417.2	7.42692	1988.63	1.02299	0.977694	2.00069	10	10	10	0	0	250 mL beaker	sand	23				8	363	7.2
Chironomus dilutus	18	1	23.6	4834.4	14.8538	3977.26	2.04598	1.95539	4.00137	10	10	10	0	0	250 mL beaker	sand	23				8	362	7.2
Chironomus dilutus	18	2	23.6	4834.4	14.8538	3977.26	2.04598	1.95539	4.00137	10	10	10	0	0	250 mL beaker	sand	23				8	362	7
Chironomus dilutus	19	1	0.5	202.4	0.3147	166.514	0.0433471	0.0818655	0.125213	10	0	0	10	100	250 mL beaker	sand	23	8.2	333	8.7	8	361	7
Chironomus dilutus	19	2	0.5	202.4	0.3147	166.514	0.0433471	0.0818655	0.125213	10	0	0	10	100	250 mL beaker	sand	23				8	364	7.1
Chironomus dilutus	20	1	1	404.9	0.6294	333.111	0.0866942	0.163771	0.250466	10	0	0	10	100	250 mL beaker	sand	23				7.9	367	7
Chironomus dilutus	20	2	1	404.9	0.6294	333.111	0.0866942	0.163771	0.250466	10	0	0	10	100	250 mL beaker	sand	23				7.9	364	7.2
Chironomus dilutus	21	1	1.9	809.8	1.19586	666.222	0.164719	0.327543	0.492262	10	0	0	10	100	250 mL beaker	sand	23				8	358	7.2
Chironomus dilutus	21	2	1.9	809.8	1.19586	666.222	0.164719	0.327543	0.492262	10	0	0	10	100	250 mL beaker	sand	23				8	356	7.2
Chironomus dilutus	22	1	3.9	1619.5	2.45466	1332.36	0.338107	0.655046	0.993153	10	1	4	9	90	250 mL beaker	sand	23				8	352	7
Chironomus dilutus	22	2	3.9	1619.5	2.45466	1332.36	0.338107	0.655046	0.993153	10	3	4	7	70	250 mL beaker	sand	23				8	359	7.1
Chironomus dilutus	23	1	7.8	3239.1	4.90932	2664.81	0.676215	1.31013	1.98635	10	10	10	0	0	250 mL beaker	sand	23				8	360	7.1
Chironomus dilutus	23	2	7.8	3239.1	4.90932	2664.81	0.676215	1.31013	1.98635	10	10	10	0	0	250 mL beaker	sand	23				8	367	6.9
Chironomus dilutus	24	1	15.6	6478.1	9.81864	5329.53	1.35243	2.62022	3.97265	10	10	10	0	0	250 mL beaker	sand	23				8	379	6.9
Chironomus dilutus	24	2	15.6	6478.1	9.81864	5329.53	1.35243	2.62022	3.97265	10	10	10	0	0	250 mL beaker	sand	23				7.9	374	6.9
Chironomus dilutus	25	1	0	302.2	0	248.62	0	0.122232	0.122232	10	0	0	10	100	250 mL beaker	sand	23	8.2	329	8.7	7.9	371	6.9
Chironomus dilutus	25	2	0	302.2	0	248.62	0	0.122232	0.122232	10	0	0	10	100	250 mL beaker	sand	23				8	371	6.9
Chironomus dilutus	26	1	0	604.3	0	497.158	0	0.244424	0.244424	10	0	0	10	100	250 mL beaker	sand	23				8	360	7
Chironomus dilutus	26	2	0	604.3	0	497.158	0	0.244424	0.244424	10	0	0	10	100	250 mL beaker	sand	23				8	366	7
Chironomus dilutus	27	1	0	1208.6	0	994.315	0	0.488847	0.488847	10	0	0	10	100	250 mL beaker	sand	23				8	364	7
Chironomus dilutus	27	2	0	1208.6	0	994.315	0	0.488847	0.488847	10	0	0	10	100	250 mL beaker	sand	23				8	368	7.1
Chironomus dilutus	28	1	0	2417.2	0	1988.63	0	0.977694	0.977694	10	2	3	8	80	250 mL beaker	sand	23				7.9	366	6.8
Chironomus dilutus	28	2	0	2417.2	0	1988.63	0	0.977694	0.977694	10	6	6	4	40	250 mL beaker	sand	23				7.9	367	6.8
Chironomus dilutus	29	1	0	4834.4	0	3977.26	0	1.95539	1.95539	10	10	10	0	0	250 mL beaker	sand	23				7.9	366	6.8
Chironomus dilutus	29	2	0	4834.4	0	3977.26	0	1.95539	1.95539	10	10	10	0	0	250 mL beaker	sand	23				8	367	7
Chironomus dilutus	30	1	0	9668.8	0	7954.52	0	3.91078	3.91078	10	10	10	0	0	250 mL beaker	sand	23				8	361	7.2
Chironomus dilutus	30	2	0	9668.8	0	7954.52	0	3.91078	3.91078	10	10	10	0	0	250 mL beaker	sand	23				8	367	7.1
Lumbriculus variegatus	0	1	0	0	0	0	0	0	0	10	0	0	10	100	250 mL beaker	none	23	8.2	316	8.8	8.3	383	8.2
Lumbriculus variegatus	0	2	0	0	0	0	0	0	0	10	0	0	10	100	250 mL beaker	none	23				8.3	371	8.2
Lumbriculus variegatus	1	1	5.7	0	3.86574	0	0.0888676	0	0.0888676	10	0	0	10	100	250 mL beaker	none	23	8.2	313	8.9	8.3	372	8.2
Lumbriculus variegatus	1	2	5.7	0	3.86574	0	0.0888676	0	0.0888676	10	0	0	10	100	250 mL beaker	none	23				8.3	364	8.2
Lumbriculus variegatus	2	1	11.4	0	7.73148	0	0.177735	0	0.177735	10	0	0	10	100	250 mL beaker	none	23				8.3	372	8.2
Lumbriculus variegatus	2	2	11.4	0	7.73148	0	0.177735	0	0.177735	10	0	0	10	100	250 mL beaker	none	23				8.3	364	8.2
Lumbriculus variegatus	3	1	22.7	0	15.3951	0	0.353911	0	0.353911	10	0	10	10	100	250 mL beaker	none	23				8.3	386	8.2
Lumbriculus variegatus	3	2	22.7	0	15.3951	0	0.353911	0	0.353911	10	0	10	10	100	250 mL beaker	none	23				8.3	371	8.2
Lumbriculus variegatus	4	1	45.4	0	30.7903	0	0.707823	0	0.707823	10	0	10	10	100	250 mL beaker	none	23				8.3	373	8
Lumbriculus variegatus	4	2	45.4	0	30.7903	0	0.707823	0	0.707823	10	0	10	10	100	250 mL beaker	none	23				8.3	366	8.1
Lumbriculus variegatus	5	1	90.8	0	61.5806	0	1.41565	0	1.41565	10	10	10	0	0	250 mL beaker	none	23				8.1	372	7.1
Lumbriculus variegatus	5	2	90.8	0	61.5806	0	1.41565	0	1.41565	10	10	10	0	0	250 mL beaker	none	23				8.1	378	7.7
Lumbriculus variegatus	6	1	181.6	0	123.161	0	2.83129	0	2.83129	10	10	10	0	0	250 mL beaker	none	23				8.1	367	7.3
Lumbriculus variegatus	6	2	181.6	0	123.161	0	2.83129	0	2.83129	10	10	10	0	0	250 mL beaker	none	23				8.2	381	7.4
Lumbriculus variegatus	7	1	3.8	456.7	2.57716	351.065	0.0592451	0.0398169	0.0990619	10	0	0	10	100	250 mL beaker	none	23	8.2	313	8.8	8.2	372	8.1
Lumbriculus variegatus	7	2	3.8	456.7	2.57716	351.065	0.0592451	0.0398169	0.0990619	10	0	0	10	100	250 mL beaker	none	23				8.2	371	8.3
Lumbriculus variegatus	8	1	7.6	913.4	5.15432	702.131	0.11849	0.0796337	0.198124	10	0	0	10	100	250 mL beaker	none	23				8.3	365	8.2
Lumbriculus variegatus	8	2	7.6	913.4	5.15432	702.131	0.11849	0.0796337	0.198124	10	0	0	10	100	250 mL beaker	none	23				8.3	388	8.2
Lumbriculus variegatus	9	1	15.2	1826.7	10.3086	1404.18	0.23698	0.159259	0.396239	10	0	10	10	100	250 mL beaker	none	23				8.3	366	8.2
Lumbriculus variegatus	9	2	15.2	1826.7	10.3086	1404.18	0.23698	0.159259	0.396239	10	0	10	10	100	250 mL beaker	none	23				8.3	367	8.1
Lumbriculus variegatus	10	1	30.4	3653.4	20.6173	2808.37	0.47396	0.318517	0.792478	10	0	10	10	100	250 mL beaker	none	23				8.3	384	8.2
Lumbriculus variegatus	10	2	30.4	3653.4	20.6173	2808.37	0.47396	0.318517	0.792478	10	0	10	10	100	250 mL beaker	none	23				8.3	370	8.2
Lumbriculus variegatus	11	1	60.8	7306.8	41.2346	5616.74	0.947921	0.637035	1.58496	10	0	10	10	100	250 mL beaker	none	23				8.3	383	8.2
Lumbriculus variegatus	11	2	60.8	7306.7	41.2346	5616.66	0.947921	0.637026	1.58495	10	0	10	10	100	250 mL beaker	none	23				8.3	374	8.2
Lumbriculus variegatus	12	1	121.7	14613.7	82.5369	11233.6	1.8974	1.27408	3.17148	10	10	10	0	0	250 mL beaker	none	23				8.2	371	7.8
Lumbriculus variegatus	12	2	121.7	14613.7	82.5369	11233.6	1.8974	1.27408	3.17148	10	10	10	0	0	250 mL beaker	none	23				8.1	387	7.6
Lumbriculus variegatus	13	1	2.8	691.9	1.89896	531.864	0.0436543	0.0603225	0.103977	10	0	0	10	100	250 mL beaker	none	23	8.2	312	8.8	8.2	362	8.2
Lumbriculus variegatus	13	2	2.8	691.9	1.89896	531.864	0.0436543	0.0603225	0.103977	10	0	0	10	100	250 mL beaker	none	23				8.3	373	8.3
Lumbriculus variegatus	14	1	5.7	1383.9	3.86574	1063.8	0.0888676	0.120654	0.209521	10	0	0	10	100	250 mL beaker	none	23				8.3	367	8.3
Lumbriculus variegatus	14	2	5.7	1383.9	3.86574	1063.8	0.0888676	0.120654	0.209521	10	0	0	10	100	250 mL beaker	none	23				8.3	366	8.3
Lumbriculus variegatus	15	1	11.4	2767.7	7.73148	2127.53	0.177735	0.241299	0.419034	10	0	0	10	100	250 mL beaker	none	23				8.3	363	8.2
Lumbriculus variegatus	15	2	11.4	2767.7	7.73148	2127.53	0.177735	0.241299	0.419034	10	0	0	10	100	250 mL beaker	none	23				8.3	394	8.3
Lumbriculus variegatus	16	1	22.7	5535.5	15.3951	4255.14	0.353911	0.482606	0.836517	10	0	10	10	100	250 mL beaker	none	23				8.3	390	8.2
Lumbriculus variegatus	16	2	22.7	5535.5	15.3951	4255.14	0.353911	0.482606	0.836517	10	0	10	10	100	250 mL beaker	none	23				8.3	381	8.2
Lumbriculus variegatus	17	1	45.4	11071	30.7903	8510.28	0.707823	0.965212	1.67303	10	10	10	0	0	250 mL beaker	none	23				8.2	393	8.2
Lumbriculus variegatus	17	2	45.4	11071	30.7903	8510.28	0.707823	0.965212	1.67303	10	9	10	1	10	250 mL beaker	none	23				8.2	375	8.1
Lumbriculus variegatus	18	1	90.8	22141.9	61.5806	17020.5	1.41565	1.93042	3.34606	10	10	10	0	0	250 mL beaker	none	23				8.2	404	8
Lumbriculus variegatus	18	2	90.8	22141.9	61.5806	17020.5	1.41565	1.93042	3.34606	10	10	10	0	0	250 mL beaker	none	23				8.3	406	8.1
Lumbriculus variegatus	19	1	1.9	927.2	1.28858	712.739	0.0296225	0.0808369	0.110459	10	0	0	10	100	250 mL beaker	none	23	8.2	312	8.9	8.3	374	8.2
Lumbriculus variegatus	19	2	1.9	927.2	1.28858	712.739	0.0296225	0.0808369	0.110459	10	0	0	10	100	250 mL beaker	none	23				8.3	375	8.2
Lumbriculus variegatus	20	1	3.7	1854.4	2.50934	1425.48	0.057686	0.161674	0.21936	10	0	0	10	100	250 mL beaker	none	23				8.3	377	8.3
Lumbriculus variegatus	20	2	3.7	1854.4	2.50934	1425.48	0.057686	0.161674	0.21936	10	0	0	10	100	250 mL beaker	none	23				8.3	380	8.2
Lumbriculus variegatus	21	1	7.5	3708.8	5.0865	2850.95	0.116931	0.323347	0.440278	10	0	0	10	100	250 mL beaker	none	23				8.3	365	8.2
Lumbriculus variegatus	21	2	7.5	3708.8	5.0865	2850.95	0.116931	0.323347	0.440278	10	0	0	10	100	250 mL beaker	none	23				8.3	366	8.2
Lumbriculus variegatus	22	1	15	7417.5	10.173	5701.83	0.233862	0.646686	0.880548	10	0	10	10	100	250 mL beaker	none	23				8.3	362	8.1
Lumbriculus variegatus	22	2	15	7417.5	10.173	5701.83	0.233862	0.646686	0.880548	10	0	10	10	100	250 mL beaker	none	23				8.3	369	8.1
Lumbriculus variegatus	23	1	30	14835.1	20.346	11403.7	0.467724	1.29338	1.76111	10	10	10	0	0	250 mL beaker	none	23				8.2	380	7.6
Lumbriculus variegatus	23	2	30	14835.1	20.346	11403.7	0.467724	1.29338	1.76111	10	10	10	0	0	250 mL beaker	none	23				8.1	372	7.3
Lumbriculus variegatus	24	1	59.9	29670.2	40.6242	22807.5	0.933889	2.58676	3.52065	10	10	10	0	0	250 mL beaker	none	23				8.3	415	8.2
Lumbriculus variegatus	24	2	59.9	29670.2	40.6242	22807.5	0.933889	2.58676	3.52065	10	10	10	0	0	250 mL beaker	none	23				8.3	412	8.1
Lumbriculus variegatus	25	1	0	1383.9	0	1063.8	0	0.120654	0.120654	10	0	0	10	100	250 mL beaker	none	23	8.2	313	8.9	8.3	372	8.3
Lumbriculus variegatus	25	2	0	1383.9	0	1063.8	0	0.120654	0.120654	10	0	0	10	100	250 mL beaker	none	23				8.3	399	8.3
Lumbriculus variegatus	26	1	0	2767.7	0	2127.53	0	0.241299	0.241299	10	0	0	10	100	250 mL beaker	none	23				8.3	379	8.3
Lumbriculus variegatus	26	2	0	2767.7	0	2127.53	0	0.241299	0.241299	10	0	0	10	100	250 mL beaker	none	23				8.3	386	8.3
Lumbriculus variegatus	27	1	0	5535.5	0	4255.14	0	0.482606	0.482606	10	0	0	10	100	250 mL beaker	none	23				8.3	385	8.3
Lumbriculus variegatus	27	2	0	5535.5	0	4255.14	0	0.482606	0.482606	10	0	0	10	100	250 mL beaker	none	23				8.3	389	8.3
Lumbriculus variegatus	28	1	0	11071	0	8510.28	0	0.965212	0.965212	10	4	10	6	60	250 mL beaker	none	23				8.2	412	8.1
Lumbriculus variegatus	28	2	0	11071	0	8510.28	0	0.965212	0.965212	10	3	10	7	70	250 mL beaker	none	23				8.3	388	8.1
Lumbriculus variegatus	29	1	0	22141.9	0	17020.5	0	1.93042	1.93042	10	10	10	0	0	250 mL beaker	none	23				8.2	383	7.9
Lumbriculus variegatus	29	2	0	22141.9	0	17020.5	0	1.93042	1.93042	10	10	10	0	0	250 mL beaker	none	23				8.2	374	7.8
Lumbriculus variegatus	30	1	0	44283.8	0	34041	0	3.86083	3.86083	10				0	250 mL beaker	none	23
Lumbriculus variegatus	30	2	0	44283.8	0	34041	0	3.86083	3.86083	10				0	250 mL beaker	none	23
Neocloeon triangulifer	0	1	0	0	0	0	0	0	0	5	0	0	5	50	30 mL cup	none	25	8.3	325	8.8	8.5	347	8.7
Neocloeon triangulifer	0	2	0	0	0	0	0	0	0	5	0	0	5	50	30 mL cup	none	25
Neocloeon triangulifer	0	3	0	0	0	0	0	0	0	5	0	0	5	50	30 mL cup	none	25
Neocloeon triangulifer	0	4	0	0	0	0	0	0	0	5	0	0	5	50	30 mL cup	none	25
Neocloeon triangulifer	1	1	0.65	0	0.37453	0	0.100142	0	0.100142	5	0	0	5	50	30 mL cup	none	25	8.3	326	8.8	8.5	350	8.7
Neocloeon triangulifer	1	2	0.65	0	0.37453	0	0.100142	0	0.100142	5	0	0	5	50	30 mL cup	none	25
Neocloeon triangulifer	1	3	0.65	0	0.37453	0	0.100142	0	0.100142	5	0	0	5	50	30 mL cup	none	25
Neocloeon triangulifer	1	4	0.65	0	0.37453	0	0.100142	0	0.100142	5	0	0	5	50	30 mL cup	none	25
Neocloeon triangulifer	2	1	1.3	0	0.74906	0	0.200283	0	0.200283	5	0	0	5	50	30 mL cup	none	25				8.5	356	8.7
Neocloeon triangulifer	2	2	1.3	0	0.74906	0	0.200283	0	0.200283	5	0	0	5	50	30 mL cup	none	25
Neocloeon triangulifer	2	3	1.3	0	0.74906	0	0.200283	0	0.200283	5	0	0	5	50	30 mL cup	none	25
Neocloeon triangulifer	2	4	1.3	0	0.74906	0	0.200283	0	0.200283	5	0	0	5	50	30 mL cup	none	25
Neocloeon triangulifer	3	1	2.6	0	1.49812	0	0.400567	0	0.400567	5	1	1	4	40	30 mL cup	none	25				8.5	359	8.6
Neocloeon triangulifer	3	2	2.6	0	1.49812	0	0.400567	0	0.400567	5	0	0	5	50	30 mL cup	none	25
Neocloeon triangulifer	3	3	2.6	0	1.49812	0	0.400567	0	0.400567	5	0	0	5	50	30 mL cup	none	25
Neocloeon triangulifer	3	4	2.6	0	1.49812	0	0.400567	0	0.400567	5	0	0	5	50	30 mL cup	none	25
Neocloeon triangulifer	4	1	5.2	0	2.99624	0	0.801134	0	0.801134	5	0	0	5	50	30 mL cup	none	25				8.5	347	8.7
Neocloeon triangulifer	4	2	5.2	0	2.99624	0	0.801134	0	0.801134	5	1	1	4	40	30 mL cup	none	25
Neocloeon triangulifer	4	3	5.2	0	2.99624	0	0.801134	0	0.801134	5	1	1	4	40	30 mL cup	none	25
Neocloeon triangulifer	4	4	5.2	0	2.99624	0	0.801134	0	0.801134	5	0	0	5	50	30 mL cup	none	25
Neocloeon triangulifer	5	1	10.4	0	5.99248	0	1.60227	0	1.60227	5	5	5	0	0	30 mL cup	none	25				8.5	348	8.6
Neocloeon triangulifer	5	2	10.4	0	5.99248	0	1.60227	0	1.60227	5	5	5	0	0	30 mL cup	none	25
Neocloeon triangulifer	5	3	10.4	0	5.99248	0	1.60227	0	1.60227	5	5	5	0	0	30 mL cup	none	25
Neocloeon triangulifer	5	4	10.4	0	5.99248	0	1.60227	0	1.60227	5	5	5	0	0	30 mL cup	none	25
Neocloeon triangulifer	6	1	20.8	0	11.985	0	3.20453	0	3.20453	5	5	5	0	0	30 mL cup	none	25				8.5	351	8.6
Neocloeon triangulifer	6	2	20.8	0	11.985	0	3.20453	0	3.20453	5	5	5	0	0	30 mL cup	none	25
Neocloeon triangulifer	6	3	20.8	0	11.985	0	3.20453	0	3.20453	5	5	5	0	0	30 mL cup	none	25
Neocloeon triangulifer	6	4	20.8	0	11.985	0	3.20453	0	3.20453	5	5	5	0	0	30 mL cup	none	25
Neocloeon triangulifer	7	1	0.4	51.8	0.23048	38.6324	0.0616257	0.0381367	0.0997623	5	0	0	5	50	30 mL cup	none	25	8.3	324	8.8	8.5	362	8.6
Neocloeon triangulifer	7	2	0.4	51.8	0.23048	38.6324	0.0616257	0.0381367	0.0997623	5	0	0	5	50	30 mL cup	none	25
Neocloeon triangulifer	7	3	0.4	51.8	0.23048	38.6324	0.0616257	0.0381367	0.0997623	5	1	1	4	40	30 mL cup	none	25
Neocloeon triangulifer	7	4	0.4	51.8	0.23048	38.6324	0.0616257	0.0381367	0.0997623	5	1	1	4	40	30 mL cup	none	25
Neocloeon triangulifer	8	1	0.9	103.7	0.51858	77.3395	0.138658	0.0763469	0.215005	5	0	0	5	50	30 mL cup	none	25				8.4	361	8.7
Neocloeon triangulifer	8	2	0.9	103.7	0.51858	77.3395	0.138658	0.0763469	0.215005	5	0	0	5	50	30 mL cup	none	25
Neocloeon triangulifer	8	3	0.9	103.7	0.51858	77.3395	0.138658	0.0763469	0.215005	5	1	1	4	40	30 mL cup	none	25
Neocloeon triangulifer	8	4	0.9	103.7	0.51858	77.3395	0.138658	0.0763469	0.215005	5	0	0	5	50	30 mL cup	none	25
Neocloeon triangulifer	9	1	1.7	207.3	0.97954	154.604	0.261909	0.15262	0.414529	5	0	0	5	50	30 mL cup	none	25				8.5	349	8.6
Neocloeon triangulifer	9	2	1.7	207.3	0.97954	154.604	0.261909	0.15262	0.414529	5	0	0	5	50	30 mL cup	none	25
Neocloeon triangulifer	9	3	1.7	207.3	0.97954	154.604	0.261909	0.15262	0.414529	5	1	1	4	40	30 mL cup	none	25
Neocloeon triangulifer	9	4	1.7	207.3	0.97954	154.604	0.261909	0.15262	0.414529	5	1	0	4	40	30 mL cup	none	25
Neocloeon triangulifer	10	1	3.5	414.6	2.0167	309.209	0.539225	0.305241	0.844465	5	0	0	5	50	30 mL cup	none	25				8.5	349	8.6
Neocloeon triangulifer	10	2	3.5	414.6	2.0167	309.209	0.539225	0.305241	0.844465	5	2	2	3	30	30 mL cup	none	25
Neocloeon triangulifer	10	3	3.5	414.6	2.0167	309.209	0.539225	0.305241	0.844465	5	0	0	5	50	30 mL cup	none	25
Neocloeon triangulifer	10	4	3.5	414.6	2.0167	309.209	0.539225	0.305241	0.844465	5	1	1	4	40	30 mL cup	none	25
Neocloeon triangulifer	11	1	7	829.2	4.0334	618.417	1.07845	0.610481	1.68893	5	5	5	0	0	30 mL cup	none	25				8.5	352	8.6
Neocloeon triangulifer	11	2	7	829.2	4.0334	618.417	1.07845	0.610481	1.68893	5	5	5	0	0	30 mL cup	none	25
Neocloeon triangulifer	11	3	7	829.2	4.0334	618.417	1.07845	0.610481	1.68893	5	5	5	0	0	30 mL cup	none	25
Neocloeon triangulifer	11	4	7	829.2	4.0334	618.417	1.07845	0.610481	1.68893	5	3	5	2	20	30 mL cup	none	25
Neocloeon triangulifer	12	1	13.9	1658.4	8.00918	1236.83	2.14149	1.22096	3.36245	5	5	5	0	0	30 mL cup	none	25				8.5	350	8.6
Neocloeon triangulifer	12	2	13.9	1658.4	8.00918	1236.83	2.14149	1.22096	3.36245	5	5	5	0	0	30 mL cup	none	25
Neocloeon triangulifer	12	3	13.9	1658.4	8.00918	1236.83	2.14149	1.22096	3.36245	5	5	5	0	0	30 mL cup	none	25
Neocloeon triangulifer	12	4	13.9	1658.4	8.00918	1236.83	2.14149	1.22096	3.36245	5	5	5	0	0	30 mL cup	none	25
Neocloeon triangulifer	13	1	0.33	78.5	0.190146	58.5453	0.0508412	0.057794	0.108635	5	2	0	3	30	30 mL cup	none	25	8.3	323	8.8	8.5	352	8.6
Neocloeon triangulifer	13	2	0.33	78.5	0.190146	58.5453	0.0508412	0.057794	0.108635	5	0	0	5	50	30 mL cup	none	25
Neocloeon triangulifer	13	3	0.33	78.5	0.190146	58.5453	0.0508412	0.057794	0.108635	5	0	0	5	50	30 mL cup	none	25
Neocloeon triangulifer	13	4	0.33	78.5	0.190146	58.5453	0.0508412	0.057794	0.108635	5	0	0	5	50	30 mL cup	none	25
Neocloeon triangulifer	14	1	0.65	157.1	0.37453	117.165	0.100142	0.115662	0.215803	5	0	0	5	50	30 mL cup	none	25				8.5	353	8.6
Neocloeon triangulifer	14	2	0.65	157.1	0.37453	117.165	0.100142	0.115662	0.215803	5	0	0	5	50	30 mL cup	none	25
Neocloeon triangulifer	14	3	0.65	157.1	0.37453	117.165	0.100142	0.115662	0.215803	5	0	0	5	50	30 mL cup	none	25
Neocloeon triangulifer	14	4	0.65	157.1	0.37453	117.165	0.100142	0.115662	0.215803	5	0	0	5	50	30 mL cup	none	25
Neocloeon triangulifer	15	1	1.3	314.1	0.74906	234.256	0.200283	0.23125	0.431533	5	0	0	5	50	30 mL cup	none	25				8.5	347	8.8
Neocloeon triangulifer	15	2	1.3	314.1	0.74906	234.256	0.200283	0.23125	0.431533	5	0	0	5	50	30 mL cup	none	25
Neocloeon triangulifer	15	3	1.3	314.1	0.74906	234.256	0.200283	0.23125	0.431533	5	1	1	4	40	30 mL cup	none	25
Neocloeon triangulifer	15	4	1.3	314.1	0.74906	234.256	0.200283	0.23125	0.431533	5	0	0	5	50	30 mL cup	none	25
Neocloeon triangulifer	16	1	2.6	628.2	1.49812	468.512	0.400567	0.462499	0.863066	5	1	1	4	40	30 mL cup	none	25				8.6	370	8.9
Neocloeon triangulifer	16	2	2.6	628.2	1.49812	468.512	0.400567	0.462499	0.863066	5	1	1	4	40	30 mL cup	none	25
Neocloeon triangulifer	16	3	2.6	628.2	1.49812	468.512	0.400567	0.462499	0.863066	5	1	1	4	40	30 mL cup	none	25
Neocloeon triangulifer	16	4	2.6	628.2	1.49812	468.512	0.400567	0.462499	0.863066	5	1	1	4	40	30 mL cup	none	25
Neocloeon triangulifer	17	1	5.2	1256.4	2.99624	937.023	0.801134	0.924998	1.72613	5	5	5	0	0	30 mL cup	none	25				8.5	357	8.9
Neocloeon triangulifer	17	2	5.2	1256.4	2.99624	937.023	0.801134	0.924998	1.72613	5	5	5	0	0	30 mL cup	none	25
Neocloeon triangulifer	17	3	5.2	1256.4	2.99624	937.023	0.801134	0.924998	1.72613	5	4	5	1	10	30 mL cup	none	25
Neocloeon triangulifer	17	4	5.2	1256.4	2.99624	937.023	0.801134	0.924998	1.72613	5	3	5	2	20	30 mL cup	none	25
Neocloeon triangulifer	18	1	10.4	2512.8	5.99248	1874.05	1.60227	1.85	3.45226	5	5	5	0	0	30 mL cup	none	25				8.6	358	8.7
Neocloeon triangulifer	18	2	10.4	2512.8	5.99248	1874.05	1.60227	1.85	3.45226	5	5	5	0	0	30 mL cup	none	25
Neocloeon triangulifer	18	3	10.4	2512.8	5.99248	1874.05	1.60227	1.85	3.45226	5	5	5	0	0	30 mL cup	none	25
Neocloeon triangulifer	18	4	10.4	2512.8	5.99248	1874.05	1.60227	1.85	3.45226	5	5	5	0	0	30 mL cup	none	25
Neocloeon triangulifer	19	1	0.2	105.2	0.11524	78.4582	0.0308128	0.0774513	0.108264	5	0	0	5	50	30 mL cup	none	25	8.3	323	8.8	8.6	358	8.7
Neocloeon triangulifer	19	2	0.2	105.2	0.11524	78.4582	0.0308128	0.0774513	0.108264	5	0	0	5	50	30 mL cup	none	25
Neocloeon triangulifer	19	3	0.2	105.2	0.11524	78.4582	0.0308128	0.0774513	0.108264	5	0	0	5	50	30 mL cup	none	25
Neocloeon triangulifer	19	4	0.2	105.2	0.11524	78.4582	0.0308128	0.0774513	0.108264	5	0	0	5	50	30 mL cup	none	25
Neocloeon triangulifer	20	1	0.4	210.4	0.23048	156.916	0.0616257	0.154903	0.216528	5	1	1	4	40	30 mL cup	none	25				8.6	353	8.8
Neocloeon triangulifer	20	2	0.4	210.4	0.23048	156.916	0.0616257	0.154903	0.216528	5	1	1	4	40	30 mL cup	none	25
Neocloeon triangulifer	20	3	0.4	210.4	0.23048	156.916	0.0616257	0.154903	0.216528	5	0	0	5	50	30 mL cup	none	25
Neocloeon triangulifer	20	4	0.4	210.4	0.23048	156.916	0.0616257	0.154903	0.216528	5	0	0	5	50	30 mL cup	none	25
Neocloeon triangulifer	21	1	0.9	420.9	0.51858	313.907	0.138658	0.309879	0.448537	5	0	0	5	50	30 mL cup	none	25				8.6	383	8.8
Neocloeon triangulifer	21	2	0.9	420.9	0.51858	313.907	0.138658	0.309879	0.448537	5	1	1	4	40	30 mL cup	none	25
Neocloeon triangulifer	21	3	0.9	420.9	0.51858	313.907	0.138658	0.309879	0.448537	5	0	0	5	50	30 mL cup	none	25
Neocloeon triangulifer	21	4	0.9	420.9	0.51858	313.907	0.138658	0.309879	0.448537	5	1	1	4	40	30 mL cup	none	25
Neocloeon triangulifer	22	1	1.7	841.8	0.97954	627.814	0.261909	0.619758	0.881667	5	2	2	3	30	30 mL cup	none	25				8.6	348	8.9
Neocloeon triangulifer	22	2	1.7	841.8	0.97954	627.814	0.261909	0.619758	0.881667	5	1	1	4	40	30 mL cup	none	25
Neocloeon triangulifer	22	3	1.7	841.8	0.97954	627.814	0.261909	0.619758	0.881667	5	1	1	4	40	30 mL cup	none	25
Neocloeon triangulifer	22	4	1.7	841.8	0.97954	627.814	0.261909	0.619758	0.881667	5	1	1	4	40	30 mL cup	none	25
Neocloeon triangulifer	23	1	3.4	1683.6	1.95908	1255.63	0.523818	1.23952	1.76333	5	5	5	0	0	30 mL cup	none	25				8.6	352	8.9
Neocloeon triangulifer	23	2	3.4	1683.6	1.95908	1255.63	0.523818	1.23952	1.76333	5	5	5	0	0	30 mL cup	none	25
Neocloeon triangulifer	23	3	3.4	1683.6	1.95908	1255.63	0.523818	1.23952	1.76333	5	5	5	0	0	30 mL cup	none	25
Neocloeon triangulifer	23	4	3.4	1683.6	1.95908	1255.63	0.523818	1.23952	1.76333	5	4	5	1	10	30 mL cup	none	25
Neocloeon triangulifer	24	1	6.9	3367.2	3.97578	2511.26	1.06304	2.47903	3.54207	5	5	5	0	0	30 mL cup	none	25				8.5	344	8.7
Neocloeon triangulifer	24	2	6.9	3367.2	3.97578	2511.26	1.06304	2.47903	3.54207	5	5	5	0	0	30 mL cup	none	25
Neocloeon triangulifer	24	3	6.9	3367.2	3.97578	2511.26	1.06304	2.47903	3.54207	5	5	5	0	0	30 mL cup	none	25
Neocloeon triangulifer	24	4	6.9	3367.2	3.97578	2511.26	1.06304	2.47903	3.54207	5	5	5	0	0	30 mL cup	none	25
Neocloeon triangulifer	25	1	0	157.1	0	117.165	0	0.115662	0.115662	5	0	0	5	50	30 mL cup	none	25	8.3	322	8.8	8.6	349	8.7
Neocloeon triangulifer	25	2	0	157.1	0	117.165	0	0.115662	0.115662	5	0	0	5	50	30 mL cup	none	25
Neocloeon triangulifer	25	3	0	157.1	0	117.165	0	0.115662	0.115662	5	0	0	5	50	30 mL cup	none	25
Neocloeon triangulifer	25	4	0	157.1	0	117.165	0	0.115662	0.115662	5	0	0	5	50	30 mL cup	none	25
Neocloeon triangulifer	26	1	0	314.1	0	234.256	0	0.23125	0.23125	5	1	1	4	40	30 mL cup	none	25				8.5	361	8.8
Neocloeon triangulifer	26	2	0	314.1	0	234.256	0	0.23125	0.23125	5	0	0	5	50	30 mL cup	none	25
Neocloeon triangulifer	26	3	0	314.1	0	234.256	0	0.23125	0.23125	5	0	0	5	50	30 mL cup	none	25
Neocloeon triangulifer	26	4	0	314.1	0	234.256	0	0.23125	0.23125	5	2	2	3	30	30 mL cup	none	25
Neocloeon triangulifer	27	1	0	628.2	0	468.512	0	0.462499	0.462499	5	1	1	4	40	30 mL cup	none	25				8.5	363	9
Neocloeon triangulifer	27	2	0	628.2	0	468.512	0	0.462499	0.462499	5	0	0	5	50	30 mL cup	none	25
Neocloeon triangulifer	27	3	0	628.2	0	468.512	0	0.462499	0.462499	5	0	0	5	50	30 mL cup	none	25
Neocloeon triangulifer	27	4	0	628.2	0	468.512	0	0.462499	0.462499	5	0	0	5	50	30 mL cup	none	25
Neocloeon triangulifer	28	1	0	1256.4	0	937.023	0	0.924998	0.924998	5	3	3	2	20	30 mL cup	none	25				8.5	385	8.8
Neocloeon triangulifer	28	2	0	1256.4	0	937.023	0	0.924998	0.924998	5	2	2	3	30	30 mL cup	none	25
Neocloeon triangulifer	28	3	0	1256.4	0	937.023	0	0.924998	0.924998	5	0	0	5	50	30 mL cup	none	25
Neocloeon triangulifer	28	4	0	1256.4	0	937.023	0	0.924998	0.924998	5	1	1	4	40	30 mL cup	none	25
Neocloeon triangulifer	29	1	0	2512.8	0	1874.05	0	1.85	1.85	5	5	5	0	0	30 mL cup	none	25				8.5	381	8.8
Neocloeon triangulifer	29	2	0	2512.8	0	1874.05	0	1.85	1.85	5	5	5	0	0	30 mL cup	none	25
Neocloeon triangulifer	29	3	0	2512.8	0	1874.05	0	1.85	1.85	5	5	5	0	0	30 mL cup	none	25
Neocloeon triangulifer	29	4	0	2512.8	0	1874.05	0	1.85	1.85	5	5	5	0	0	30 mL cup	none	25
Neocloeon triangulifer	30	1	0	5025.6	0	3748.09	0	3.69999	3.69999	5	3	5	2	20	30 mL cup	none	25				8.5	376	8.7
Neocloeon triangulifer	30	2	0	5025.6	0	3748.09	0	3.69999	3.69999	5	5	5	0	0	30 mL cup	none	25
Neocloeon triangulifer	30	3	0	5025.6	0	3748.09	0	3.69999	3.69999	5	5	5	0	0	30 mL cup	none	25
Neocloeon triangulifer	30	4	0	5025.6	0	3748.09	0	3.69999	3.69999	5	5	5	0	0	30 mL cup	none	25
Hyalella azteca	0	1	0	0	0	0	0	0	0	10	0	0	10	100	250 mL beaker	gauze	23	8.3	374	8.6	8.3	381	7.4
Hyalella azteca	0	2	0	0	0	0	0	0	0	10	0	0	10	100	250 mL beaker	gauze	23				8.3	386	7.5
Hyalella azteca	1	1	45.4	0	26.6725	0	0.0447901	0	0.0447901	10	0	0	10	100	250 mL beaker	gauze	23	8.3	375	8.6	8.3	361	7.3
Hyalella azteca	1	2	45.4	0	26.6725	0	0.0447901	0	0.0447901	10	0	0	10	100	250 mL beaker	gauze	23				8.3	383	7.6
Hyalella azteca	2	1	90.8	0	53.345	0	0.0895802	0	0.0895802	10	1	2	9	90	250 mL beaker	gauze	23				8.3	365	7.5
Hyalella azteca	2	2	90.8	0	53.345	0	0.0895802	0	0.0895802	10	0	1	10	100	250 mL beaker	gauze	23				8.3	393	7.6
Hyalella azteca	3	1	181.6	0	106.69	0	0.17916	0	0.17916	10	1	2	9	90	250 mL beaker	gauze	23				8.3	416	7.7
Hyalella azteca	3	2	181.6	0	106.69	0	0.17916	0	0.17916	10	0	1	10	100	250 mL beaker	gauze	23				8.3	373	7.6
Hyalella azteca	4	1	363.2	0	213.38	0	0.358321	0	0.358321	10	1	4	9	90	250 mL beaker	gauze	23				8.2	367	7.4
Hyalella azteca	4	2	363.2	0	213.38	0	0.358321	0	0.358321	10	1	3	9	90	250 mL beaker	gauze	23				8.2	369	7.5
Hyalella azteca	5	1	726.4	0	426.76	0	0.716641	0	0.716641	10	1	10	9	90	250 mL beaker	gauze	23				8.3	356	7.5
Hyalella azteca	5	2	726.4	0	426.76	0	0.716641	0	0.716641	10	1	10	9	90	250 mL beaker	gauze	23				8.2	359	7.6
Hyalella azteca	6	1	1452.8	0	853.52	0	1.43328	0	1.43328	10	8	10	2	20	250 mL beaker	gauze	23				8.2	377	7.6
Hyalella azteca	6	2	1452.8	0	853.52	0	1.43328	0	1.43328	10	9	10	1	10	250 mL beaker	gauze	23				8.2	392	7.5
Hyalella azteca	7	1	30.4	103.1	17.86	77.758	0.0299916	0.0137212	0.0437128	10	0	0	10	100	250 mL beaker	gauze	23	8.3	374	8.7	8.2	393	7.3
Hyalella azteca	7	2	30.4	103.1	17.86	77.758	0.0299916	0.0137212	0.0437128	10	0	0	10	100	250 mL beaker	gauze	23				8.2	371	7.3
Hyalella azteca	8	1	60.8	206.2	35.72	155.516	0.0599832	0.0274424	0.0874256	10	0	2	10	100	250 mL beaker	gauze	23				8.2	370	7.3
Hyalella azteca	8	2	60.8	206.2	35.72	155.516	0.0599832	0.0274424	0.0874256	10	0	0	10	100	250 mL beaker	gauze	23				8.2	361	7.3
Hyalella azteca	9	1	121.7	412.5	71.4988	311.108	0.120065	0.0548981	0.174963	10	1	6	9	90	250 mL beaker	gauze	23				8.2	378	7.6
Hyalella azteca	9	2	121.7	412.5	71.4988	311.108	0.120065	0.0548981	0.174963	10	1	5	9	90	250 mL beaker	gauze	23				8.2	371	7.5
Hyalella azteca	10	1	243.3	824.9	142.939	622.14	0.240031	0.109783	0.349814	10	2	6	8	80	250 mL beaker	gauze	23				8.1	410	7.6
Hyalella azteca	10	2	243.3	824.9	142.939	622.14	0.240031	0.109783	0.349814	10	1	4	9	90	250 mL beaker	gauze	23				8.2	372	7.6
Hyalella azteca	11	1	486.7	1649.8	285.936	1244.28	0.480162	0.219566	0.699727	10	2	10	8	80	250 mL beaker	gauze	23				8.3	391	7.4
Hyalella azteca	11	2	486.7	1649.8	285.936	1244.28	0.480162	0.219566	0.699727	10	0	10	10	100	250 mL beaker	gauze	23				8.2	357	7.5
Hyalella azteca	12	1	973.4	3299.7	571.873	2488.63	0.960323	0.439145	1.39947	10	4	10	6	60	250 mL beaker	gauze	23				8.2	347	7.5
Hyalella azteca	12	2	973.4	3299.7	571.873	2488.63	0.960323	0.439145	1.39947	10	6	10	4	40	250 mL beaker	gauze	23				8.2	359	7.5
Hyalella azteca	13	1	22.7	156.2	13.3362	117.806	0.022395	0.0207881	0.0431831	10	0	0	10	100	250 mL beaker	gauze	23	8.3	369	8.7	8.1	364	7.5
Hyalella azteca	13	2	22.7	156.2	13.3362	117.806	0.022395	0.0207881	0.0431831	10	0	1	10	100	250 mL beaker	gauze	23				8.1	366	7.4
Hyalella azteca	14	1	45.4	312.5	26.6725	235.688	0.0447901	0.0415895	0.0863796	10	0	2	10	100	250 mL beaker	gauze	23				8.2	358	7.4
Hyalella azteca	14	2	45.4	312.5	26.6725	235.688	0.0447901	0.0415895	0.0863796	10	0	1	10	100	250 mL beaker	gauze	23				8.1	359	7.4
Hyalella azteca	15	1	90.8	624.9	53.345	471.3	0.0895802	0.0831656	0.172746	10	0	3	10	100	250 mL beaker	gauze	23				8.2	383	7.5
Hyalella azteca	15	2	90.8	624.9	53.345	471.3	0.0895802	0.0831656	0.172746	10	1	5	9	90	250 mL beaker	gauze	23				8.2	382	7.5
Hyalella azteca	16	1	181.6	1249.9	106.69	942.675	0.17916	0.166345	0.345505	10	1	7	9	90	250 mL beaker	gauze	23				8.1	351	7.5
Hyalella azteca	16	2	181.6	1249.9	106.69	942.675	0.17916	0.166345	0.345505	10	1	6	9	90	250 mL beaker	gauze	23				8.2	366	7.4
Hyalella azteca	17	1	363.2	2499.8	213.38	1885.35	0.358321	0.332689	0.69101	10	3	10	7	70	250 mL beaker	gauze	23				8.1	366	7.5
Hyalella azteca	17	2	363.2	2499.8	213.38	1885.35	0.358321	0.332689	0.69101	10	4	10	6	60	250 mL beaker	gauze	23				8.1	352	7.4
Hyalella azteca	18	1	726.4	4999.5	426.76	3770.62	0.716641	0.665365	1.38201	10	9	10	1	10	250 mL beaker	gauze	23				8.1	371	7.5
Hyalella azteca	18	2	726.4	4999.5	426.76	3770.62	0.716641	0.665365	1.38201	10	9	10	1	10	250 mL beaker	gauze	23				8.1	358	7.5
Hyalella azteca	19	1	15	209.4	8.8125	157.929	0.0147985	0.0278683	0.0426668	10	0	0	10	100	250 mL beaker	gauze	23	8.3	381	8.7	8.2	381	7.6
Hyalella azteca	19	2	15	209.4	8.8125	157.929	0.0147985	0.0278683	0.0426668	10	0	1	10	100	250 mL beaker	gauze	23				8.2	374	7.6
Hyalella azteca	20	1	30	418.7	17.625	315.784	0.029597	0.0557232	0.0853202	10	0	1	10	100	250 mL beaker	gauze	23				8.1	368	7.4
Hyalella azteca	20	2	30	418.7	17.625	315.784	0.029597	0.0557232	0.0853202	10	0	1	10	100	250 mL beaker	gauze	23				8.1	353	7.3
Hyalella azteca	21	1	59.9	837.4	35.1913	631.567	0.0590953	0.111446	0.170542	10	1	4	9	90	250 mL beaker	gauze	23				8.1	366	7.4
Hyalella azteca	21	2	59.9	837.4	35.1913	631.567	0.0590953	0.111446	0.170542	10	1	3	9	90	250 mL beaker	gauze	23				8	355	7.6
Hyalella azteca	22	1	119.9	1674.8	70.4413	1263.13	0.118289	0.222893	0.341182	10	1	8	9	90	250 mL beaker	gauze	23				8	375	7.5
Hyalella azteca	22	2	119.9	1674.8	70.4413	1263.13	0.118289	0.222893	0.341182	10	1	7	9	90	250 mL beaker	gauze	23				8.1	374	7.4
Hyalella azteca	23	1	239.7	3349.7	140.824	2526.34	0.23648	0.445799	0.682279	10	5	10	5	50	250 mL beaker	gauze	23				8.3	378	7.4
Hyalella azteca	23	2	239.7	3349.7	140.824	2526.34	0.23648	0.445799	0.682279	10	4	10	6	60	250 mL beaker	gauze	23				8.2	380	7.5
Hyalella azteca	24	1	479.4	6699.4	281.647	5052.69	0.47296	0.891598	1.36456	10	8	10	2	20	250 mL beaker	gauze	23				8.2	346	7.6
Hyalella azteca	24	2	479.4	6699.4	281.647	5052.69	0.47296	0.891598	1.36456	10	6	10	4	40	250 mL beaker	gauze	23				8.2	345	7.7
Hyalella azteca	25	1	0	312.5	0	235.688	0	0.0415895	0.0415895	10	0	0	10	100	250 mL beaker	gauze	23	8.3	379	8.7	8.2	368	7.5
Hyalella azteca	25	2	0	312.5	0	235.688	0	0.0415895	0.0415895	10	0	0	10	100	250 mL beaker	gauze	23				8.2	372	7.5
Hyalella azteca	26	1	0	624.9	0	471.3	0	0.0831656	0.0831656	10	1	2	9	90	250 mL beaker	gauze	23				8.1	359	7.6
Hyalella azteca	26	2	0	624.9	0	471.3	0	0.0831656	0.0831656	10	0	0	10	100	250 mL beaker	gauze	23				8.1	371	7.6
Hyalella azteca	27	1	0	1249.9	0	942.675	0	0.166345	0.166345	10	0	0	10	100	250 mL beaker	gauze	23				8.2	370	7.5
Hyalella azteca	27	2	0	1249.9	0	942.675	0	0.166345	0.166345	10	0	0	10	100	250 mL beaker	gauze	23				8.2	379	7.5
Hyalella azteca	28	1	0	2499.8	0	1885.35	0	0.332689	0.332689	10	0	1	10	100	250 mL beaker	gauze	23				8.2	354	7.5
Hyalella azteca	28	2	0	2499.8	0	1885.35	0	0.332689	0.332689	10	0	0	10	100	250 mL beaker	gauze	23				8.1	364	7.6
Hyalella azteca	29	1	0	4999.5	0	3770.62	0	0.665365	0.665365	10	1	5	9	90	250 mL beaker	gauze	23				8.1	353	7.7
Hyalella azteca	29	2	0	4999.5	0	3770.62	0	0.665365	0.665365	10	3	7	7	70	250 mL beaker	gauze	23				8.1	373	7.7
Hyalella azteca	30	1	0	9999	0	7541.25	0	1.33073	1.33073	10	7	10	3	30	250 mL beaker	gauze	23				8.1	366	7.8
Hyalella azteca	30	2	0	9999	0	7541.25	0	1.33073	1.33073	10	8	10	2	20	250 mL beaker	gauze	23				8.1	394	7.7
